# Supplementary material for: Mutasynthetic Production and Antimicrobial Characterization of Darobactin Analogs
Source: PubMed Central journal article supplement (PMC8694152; doi:10.1128/spectrum.01535-21), 2021-12-22
Supplement: spectrum01535-21_supp_1_seq10.pdf [file spectrum01535-21_supp_1_seq10.pdf]

# 1 Supporting Information

2

## 3 Mutasynthetic production and antimicrobial characterisation of 4 darobactin analogs

5

6 Nils Böhringer<sup>1,2,+</sup>, Robert Green<sup>3,+</sup>, Yang Liu<sup>1</sup>, Ute Mettal<sup>1</sup>, Michael Marner<sup>4</sup>, Seyed  
7 Majed Modaresi<sup>5</sup>, Roman P. Jakob<sup>5</sup>, Zerlina G. Wuisan<sup>1</sup>, Timm Maier<sup>5</sup>, Akira Inishi<sup>3</sup>,  
8 Sebastian Hiller<sup>5</sup>, Kim Lewis<sup>3,\*</sup> and Till F. Schäberle<sup>1,2,4,\*</sup>

9

10

11 <sup>1</sup> Justus-Liebig-University Gießen, 35392 Gießen, Germany; <sup>2</sup> German Center of Infection Research  
12 (DZIF), Partner Site Gießen-Marburg-Langen, 35392 Gießen, Germany; <sup>3</sup> Antimicrobial Discovery  
13 Center, Department of Biology, Northeastern University, Boston MA, USA; <sup>4</sup> Fraunhofer Institute for  
14 Molecular Biology and Applied Ecology (IME), Branch for Bioresources, 35392 Gießen, Germany; <sup>5</sup>  
15 Biozentrum, University of Basel, 4056 Basel, Switzerland.

16

17 + Equal contribution

18 \* Correspondence: k.lewis@northeastern.edu and till.f.schaeberle@agrar.uni-giessen.de

19

20

## 21 Content

22

|    |                                                                                                                                                                       |    |
|----|-----------------------------------------------------------------------------------------------------------------------------------------------------------------------|----|
| 23 | <b>Isolation of compounds</b> .....                                                                                                                                   | 3  |
| 24 | <b>Structure elucidation</b> .....                                                                                                                                    | 4  |
| 25 | <b>Minimum inhibitory concentration testing</b> .....                                                                                                                 | 4  |
| 26 | <b>Checkerboard Assays</b> .....                                                                                                                                      | 5  |
| 27 | <b>Plasma Protein Binding</b> .....                                                                                                                                   | 6  |
| 28 | <b>Figure S1:</b> General cloning strategy for exchange of core AAs in the DAR A precursor .....                                                                      | 7  |
| 29 | <b>Figure S2A:</b> Extracted ion chromatogram (EICs, calcd. [M + 2H+] <sub>2</sub> <sup>+</sup> ± 0.01 Da) of DAR A .....                                             | 8  |
| 30 | <b>Figure S2B:</b> Extracted ion chromatograms (EICs, calcd. [M + 2H+] <sub>2</sub> <sup>+</sup> ± 0.01 Da) of DAR A<br>31 (483.7089 m/z) and the DAR analogues ..... | 9  |
| 32 | <b>Figure S2C:</b> Extracted ion chromatogram (EICs, calcd. [M + 2H+] <sub>2</sub> <sup>+</sup> ± 0.01 Da) of DAR B .....                                             | 10 |
| 33 | <b>Figure S2D:</b> Extracted ion chromatogram (EICs, calcd. [M + 2H+] <sub>2</sub> <sup>+</sup> ± 0.01 Da) of DAR C.....                                              | 11 |

|    |                                                                                                                                          |    |
|----|------------------------------------------------------------------------------------------------------------------------------------------|----|
| 34 | <b>Figure S2E:</b> Extracted ion chromatogram (EICs, calcd. $[M + 2H]^2+ \pm 0.01$ Da) of DAR D.....                                     | 12 |
| 35 | <b>Figure S2F:</b> Extracted ion chromatogram (EICs, calcd. $[M + 2H]^2+ \pm 0.01$ Da) of DAR E .....                                    | 13 |
| 36 | <b>Figure S2G:</b> Extracted ion chromatogram (EICs, calcd. $[M + 2H]^2+ \pm 0.01$ Da) of DAR F.....                                     | 14 |
| 37 | <b>Figure S3A:</b> Structure of the N-terminal W of Darobactin Analogues with plausible MS/MS                                            |    |
| 38 | fragmentation pattern .....                                                                                                              | 15 |
| 39 | <b>Figure S3B:</b> Structure, sum formula and theoretical exact mass of Darobactin A with                                                |    |
| 40 | plausible MS/MS fragmentation pattern.....                                                                                               | 16 |
| 41 | <b>Figure S3C:</b> Structure, sum formula and theoretical exact mass of Darobactin B with                                                |    |
| 42 | plausible MS/MS fragmentation pattern.....                                                                                               | 17 |
| 43 | <b>Figure S3D:</b> Structure, sum formula and theoretical exact mass of Darobactin D with                                                |    |
| 44 | plausible MS/MS fragmentation pattern.....                                                                                               | 18 |
| 45 | <b>Figure S3E:</b> Structure, sum formula and theoretical exact mass of Darobactin E with                                                |    |
| 46 | plausible MS/MS fragmentation pattern.....                                                                                               | 19 |
| 47 | <b>Table S1:</b> $^1\text{H}$ (600 MHz) and $^{13}\text{C}$ (150 MHz) NMR data of Darobactin B ( $\text{D}_2\text{O}$ ; $\delta$ in ppm) |    |
| 48 | alongside correlation data from HMBC measurement .....                                                                                   | 20 |
| 49 | <b>Figure S4:</b> Structure of Darobactin B including atom numbering for table S1.....                                                   | 22 |
| 50 | <b>Figure S5A:</b> $^1\text{H}$ -NMR spectrum of Darobactin B (600 MHz, $\text{D}_2\text{O}$ ).....                                      | 23 |
| 51 | <b>Figure S5B:</b> .....                                                                                                                 | 24 |
| 52 | Expanded $^1\text{H}$ -NMR spectrum of Darobactin B (600 MHz, $\text{D}_2\text{O}$ ).....                                                | 24 |
| 53 | <b>Figure S5C:</b> $^{13}\text{C}$ -NMR spectrum of Darobactin B (150 MHz, $\text{D}_2\text{O}$ ) .....                                  | 25 |
| 54 | <b>Figure S5D:</b> COSY spectrum of Darobactin B in $\text{D}_2\text{O}$ .....                                                           | 27 |
| 55 | <b>Figure S5E:</b> TOCSY spectrum of Darobactin B in $\text{D}_2\text{O}$ .....                                                          | 28 |
| 56 | <b>Figure S5F:</b> HSQC spectrum of Darobactin B in $\text{D}_2\text{O}$ .....                                                           | 29 |
| 57 | <b>Figure S5G:</b> HMBC spectrum of Darobactin B in $\text{D}_2\text{O}$ .....                                                           | 30 |
| 58 | <b>Figure S5H:</b> NOESY spectrum of Darobactin B in $\text{D}_2\text{O}$ .....                                                          | 31 |
| 59 | <b>Figure S5I:</b> ROESY spectrum of Darobactin B in $\text{D}_2\text{O}$ .....                                                          | 32 |
| 60 | <b>Table S2:</b> Oligonucleotide sequences used to modify the DAR A core AAs in pNBDaromod.33                                            |    |
| 61 | <b>Table S3A:</b> Antibigram of the clinical isolates .....                                                                              | 33 |
| 62 | <b>Table S3B:</b> Resistance determinants of the clinical isolates .....                                                                 | 34 |
| 63 | <b>Table S4:</b> Statistics on X-ray diffraction data and refinement of BamA- $\beta$ /Darobactin B.....                                 | 34 |
| 64 |                                                                                                                                          |    |
| 65 |                                                                                                                                          |    |
| 66 |                                                                                                                                          |    |
| 67 |                                                                                                                                          |    |

## 68 Isolation of compounds

69 Purification of DAR B from the producer strain was achieved with a modified  
70 purification strategy from DAR A. Briefly, *E. coli* production strains were incubated for  
71 5 days in a 2 L Erlenmeyer flask with 1 L LB medium supplemented with 50 µg/mL  
72 kanamycin at 30 °C. Cells were removed via centrifugation and the culture supernatant  
73 was mixed with XAD16N resin (Sigma-Aldrich) overnight under agitation. DAR B was  
74 subsequently eluted from the resin with a 50/50 solution of methanol and water,  
75 containing 0.1% formic acid. The eluate was then concentrated via rotary evaporator  
76 and loaded onto a cation-exchange column (SP Sepharose XL). DAR B was eluted by  
77 step gradients of 50 mM ammonium acetate pH 7, pH 8, and pH 10. Eluates were then  
78 concentrated by freeze drying, resuspended in Milli-Q water 0.1% (v/v) formic acid,  
79 and loaded onto a C<sub>18</sub> reversed-phase high-performance liquid chromatography (RP-  
80 HPLC) column (Agilent, C18 5 µm: 250 x10mm, Restek). HPLC conditions for  
81 purification of DAR B are: solvent A, Milli-Q water and 0.1% (v/v) formic acid; solvent  
82 B, acetonitrile and 0.1% (v/v) formic acid. The initial concentration of 2% solvent B is  
83 maintained for 2 min, followed by a linear gradient to 26% B over 12 min with a flow  
84 rate of 5 mL min<sup>-1</sup>; UV detection by diode-array detector from 210 to 400 nm. Pure  
85 DAR B was then collected at 11.5 min.

86 For purification of DAR E, fermentation broth was pelleted by centrifugation. The cell  
87 pellet was extracted using 80% acetonitrile and water by sonification. The resulting  
88 crude extract was fractionated by flash chromatography using a C18 F0120 column  
89 with the following gradient: 1) 0-28min 5%ACN, 2) 28-37min increased to 15% ACN,  
90 3) 37-50 min, keeping 15% ACN, 4) 50-60min, increased to 30% ACN, 5) 60-80min,  
91 increased to 100% ACN and keeping 100% ACN for 15 min. By LCMS guided  
92 isolation, the DAR E-containing fraction was identified and further separated by HPLC  
93 using the following gradient: 1) 0-10 min 23% MeOH, 2)10-20min increased to 50%  
94 MeOH, 3) 20-30 min increased to 100% MeOH, 4) 30-37min 100%MeOH. Afterwards,  
95 the DAR E fraction was further purified by HPLC (gradient: 1) 0-5min 25%MeOH, 2)  
96 5-45 min increased to 42.5% MeOH, 3) 45-52min keeping 100% MeOH to obtain pure  
97 compound (in total 1.3 mg DAR E was isolated from a 98 L fermentation).

98 For DAR D the same procedure via flash chromatography was followed. Then, the  
99 following HPLC gradient was applied: 1) 0-5 min 15% ACN, 2) 5-25 min increased to  
100 25% ACN, 3) 25-30 min increased to 60% ACN, 4) 30-39 min 100% ACN. As before,  
101 a further HPLC separation followed to obtain DAR D as pure compound (in total, 0.6  
102 mg DAR were isolated from a 97 L fermentation).

103  
104  
105

## 106 **Structure elucidation**

107 Production of DAR A, B, D, E and F was confirmed using ultra high-  
108 performance liquid-chromatography high-resolution mass-spectrometry (UPLC-  
109 HRMS). For UPLC-HRMS measurements a setup consisting of an Agilent Infinity 1290  
110 UPLC system equipped with an Acquity UPLC BEH C18 1.7  $\mu\text{m}$  (2.1  $\times$  100 mm)  
111 column and an Acquity UPLC BEH C18 1.7  $\mu\text{m}$  VanGuard Pre-Column (2.1  $\times$  5 mm;  
112 both columns purchased from Waters, Eschborn, Germany) coupled to a DAD  
113 detector and a micrOTOFQ II mass spectrometer (Bruker Daltonics, Bremen,  
114 Germany) with an electrospray ionization source was employed. The LC system was  
115 operated using a gradient (A: H<sub>2</sub>O, 0.1% formic acid; B: MeCN, 0.1% formic acid; Flow:  
116 600  $\mu\text{L}/\text{min}$ ): 0 min: 95%A; 0.80 min: 95%A; 18.70 min: 4.75%A; 18.80 min: 0%A;  
117 23.00 min: 0%A; 23.10 min: 95%A; 25.00 min: 95%A and the column oven  
118 temperature was set to 45  $^{\circ}\text{C}$ .

119 MS data were acquired over a range from 100 to 1500  $m/z$  in positive mode. Auto  
120 MS/MS fragmentation was achieved with rising collision energy (for single charged  
121 ions: 18–45 eV over a gradient from 100 to 1000  $m/z$ ; for double charged ions: 15–  
122 32 eV over a gradient from 100 to 1000  $m/z$ ). Calibration of mass spectra was  
123 achieved using 10 mM sodium formate in H<sub>2</sub>O/ <sup>1</sup>PrOH (1:1) as internal standard.

124 Mass spectra were analysed using Bruker Data Analysis 4.2 software (Bruker  
125 Daltonics, Bremen, Germany). Masses of the expected compounds were determined  
126 using ChemDraw (PerkinElmer, Waltham, USA) and recorded chromatograms were  
127 extracted for the respective  $m/z$ . Ions with fitting ( $\Delta < 10$  ppm)  $m/z$  and plausible  
128 retention time were fragmented and fragments were matched to *in silico* identified  
129 plausible decay products (Fig. S9-S13).

130 NMR spectra were recorded in D<sub>2</sub>O as solvent on an Avance III HD 600 MHz  
131 NMR spectrometer (Bruker BioSpin GmbH, Rheinstetten, Germany). Chemical shifts  
132 are given in ppm. <sup>1</sup>H spectra were referenced to the residual solvent signal ( $\delta = 4.79$   
133 ppm). For <sup>13</sup>C measurements 3-(trimethylsilyl)propionic-2,2,3,3-d<sub>4</sub> acid sodium salt  
134 (TSPA,  $\delta = 1.7$  ppm) was used as external standard. For a better resolution of the  
135 correlation signals, HMBC spectra were measured using non-uniform sampling (NUS)  
136 and H<sub>2</sub>O suppression. Analysis of NMR spectra was accomplished using the software  
137 TopSpin 3.6.0 (Bruker BioSpin GmbH, Rheinstetten, Germany).

138

139

## 140 **Minimum inhibitory concentration testing**

141 The MICs were determined by microbroth dilution assays in round bottom 96-  
142 well plates. Overnight cultures of *E. coli* ATCC35218 and the clinical isolates *E. coli*  
143 (Table S2) NRZ14408, *E. coli* K0416, *E. coli* Survcare 052, *E. coli* MMG11; *A. baumannii*

144 ATCC19606, *K. pneumoniae* ATCC30104 and *S. enterica* ATCC13076 were adjusted  
145 to McFarland 1.0 and subsequently diluted to  $5 \times 10^5$  c.f.u. mL<sup>-1</sup> in cation adjusted  
146 Mueller Hinton 2 broth (CAMHII). Darobactins were screened in 12 concentrations  
147 ranging from 64 to 0.03  $\mu\text{g mL}^{-1}$  in triplicate. The same concentrations were tested for  
148 rifampicin, tetracycline and gentamycin as positive controls. For tetracycline resistant  
149 *E. coli* strains (NRZ14408, K0416 and MMGI1) as well as for *E. coli* Survcare 052  
150 tetracycline was substituted with a colistin dilution series (16 – 0.007  $\mu\text{g mL}^{-1}$ ).

151 Bacteria suspension without supplemented standard antibiotics or Darobactin  
152 was used as negative control. After incubation (18 h, 180 rpm, 37°C, 85 % r.H.), cell  
153 growth was determined by measuring the turbidity with a microplate  
154 spectrophotometer at 600 nm. The MIC was defined as the minimum concentration  
155 where at least 85 % growth inhibition relative to the negative control was measured.

156 MICs against the expanded panel (Table 3) were determined by microbroth  
157 dilution as well, but without shaking. In aerobic conditions, overnight cultures of *K.*  
158 *pneumoniae* strains, *E. coli* strains, *P. aeruginosa* strains, *A. baumannii* strains, *M.*  
159 *catarrhalis*, *E. cloacae*, *P. mirabilis*, *S. maltophilia*, *S. aureus* were diluted 1:100 in  
160 MHB and incubated at 37 °C with aeration at 220 rpm. Exponential cultures (OD<sub>600</sub> of  
161 0.1–0.9) were diluted to an OD<sub>600</sub> of 0.001 (approximately  $5 \times 10^5$  c.f.u. mL<sup>-1</sup>) in MHIIB  
162 and 98  $\mu\text{L}$  aliquots were transferred into round-bottom 96-well plates containing 2  $\mu\text{L}$   
163 of test compound solutions diluted serially two-fold. After overnight incubation at 37 °C,  
164 the MICs of test compounds were determined as the minimum concentration at which  
165 no growth of strains could be detected by eye. The MIC against *Salmonella*  
166 *enterica* Typhimurium LT2 and *Bacteroides fragilis* was determined under anaerobic  
167 conditions. Overnight cultures grown in brain–heart infusion (BHI) broth,  
168 supplemented with 0.5% yeast extract, 0.1% L-cysteine hydrochloride and  
169 15  $\mu\text{g/mL}$  haemin (BHI-Ych) were diluted 1:100 in BHI-Ych. The 96-well assay plates  
170 were prepared by two-fold dilution of test compounds and included a positive growth  
171 control. After 24 h incubation, the MIC was determined. All MIC assays were  
172 performed at least in triplicate.

173

#### 174 **Checkerboard Assays**

175 Checkerboard assays were performed by determining the MIC in combination  
176 of DAR A and DAR B by microbroth dilution assays in 96-well plates. Concentrations  
177 ranging from 0 to 64  $\mu\text{g/mL}$  of both compounds were tested in duplicate. Overnight

178 cultures of *E. coli* MG1655 and *K. pneumoniae* ATCC 700603 were diluted to  $5 \times 10^5$   
179 c.f.u. mL<sup>-1</sup> in MHIB. After overnight incubation at 37 °C, the MIC of test compounds  
180 were determined as the minimum concentration at which no growth of strains could  
181 be detected by eye. Fractional inhibitory concentration index (FICI) was calculated by  
182  $FICA + FICB = FICI$ , where  $FICA = MIC \text{ DAR A+B} \div MIC \text{ DAR A}$ , and  $FICB = MIC$   
183  $\text{DAR A+B} \div MIC \text{ DAR B}$ . Synergy, additive, and antagonistic effects were determined  
184 by FICI values of <0.4, 0.4-4, and >4, respectively.

185

### 186 **Plasma Protein Binding**

187 Plasma protein binding was determined by a Rapid Equilibrium Dialysis (RED)  
188 plate (Fisher 90006). The assay was performed following Bioassay Protocol 1937 (1).  
189 Briefly, DAR A and DAR B were mixed with human plasma (300 µL) at a final  
190 concentration of 10 µM. 500 µL PBS was added to the buffer chamber. The RED plate  
191 was sealed, and incubated at 37 °C at 300 rpm for 4 hours. 100 µL were removed  
192 from the sample and buffer chambers. Then, 100 µL plasma was added to the buffer  
193 samples, and 100 µL PBS was added to the plasma samples. 400 µL of acetonitrile  
194 was added, vortexed, and centrifuged for 10 minutes at 13,000 g. The samples were  
195 dried, and then resolubilized in 100 µL MilliQ water prior to quantitative measurements  
196 on LC-MS/MS. An Agilent 1260 Infinity liquid chromatography system coupled to a  
197 6530 quadrupole time-of-flight (QToF) mass spectrometer equipped with an  
198 electrospray ionization source (Agilent Technologies) was used to quantify DAR A and  
199 DAR B. An Agilent ZORBAX Extend-C18 column (50 mm × 2.1 mm, 1.8 µm) was  
200 utilized for the separation with a flow rate of 100 µL/min with solvent A (0.1% (v/v)  
201 formic acid in Milli-Q water) and solvent B (0.1% (v/v) formic acid in acetonitrile). The  
202 initial concentration of 2% solvent B was maintained for 2 min, followed by a linear  
203 gradient to 95% over 7 min. MS parameters were as follows: gas temperature, 300 °C;  
204 gas flow, 7 L/min; nebulizer 35 psi; fragmentor voltage, 175 V; skimmer voltage, 65 V.  
205 Acquisition was set in positive mode at “Targeted MS/MS” with a precursor m/z 483.7,  
206  $z = 2$ , collision energy 12 V for DAR A and a precursor m/z 350.15,  $z = 3$ , collision  
207 energy 11 V for DAR B. MassHunter qualitative analysis (Agilent Technologies) and  
208 Skyline (MacCoss Lab Software, University of Washington) were used to perform  
209 relative quantification of DAR A and DAR B (2).

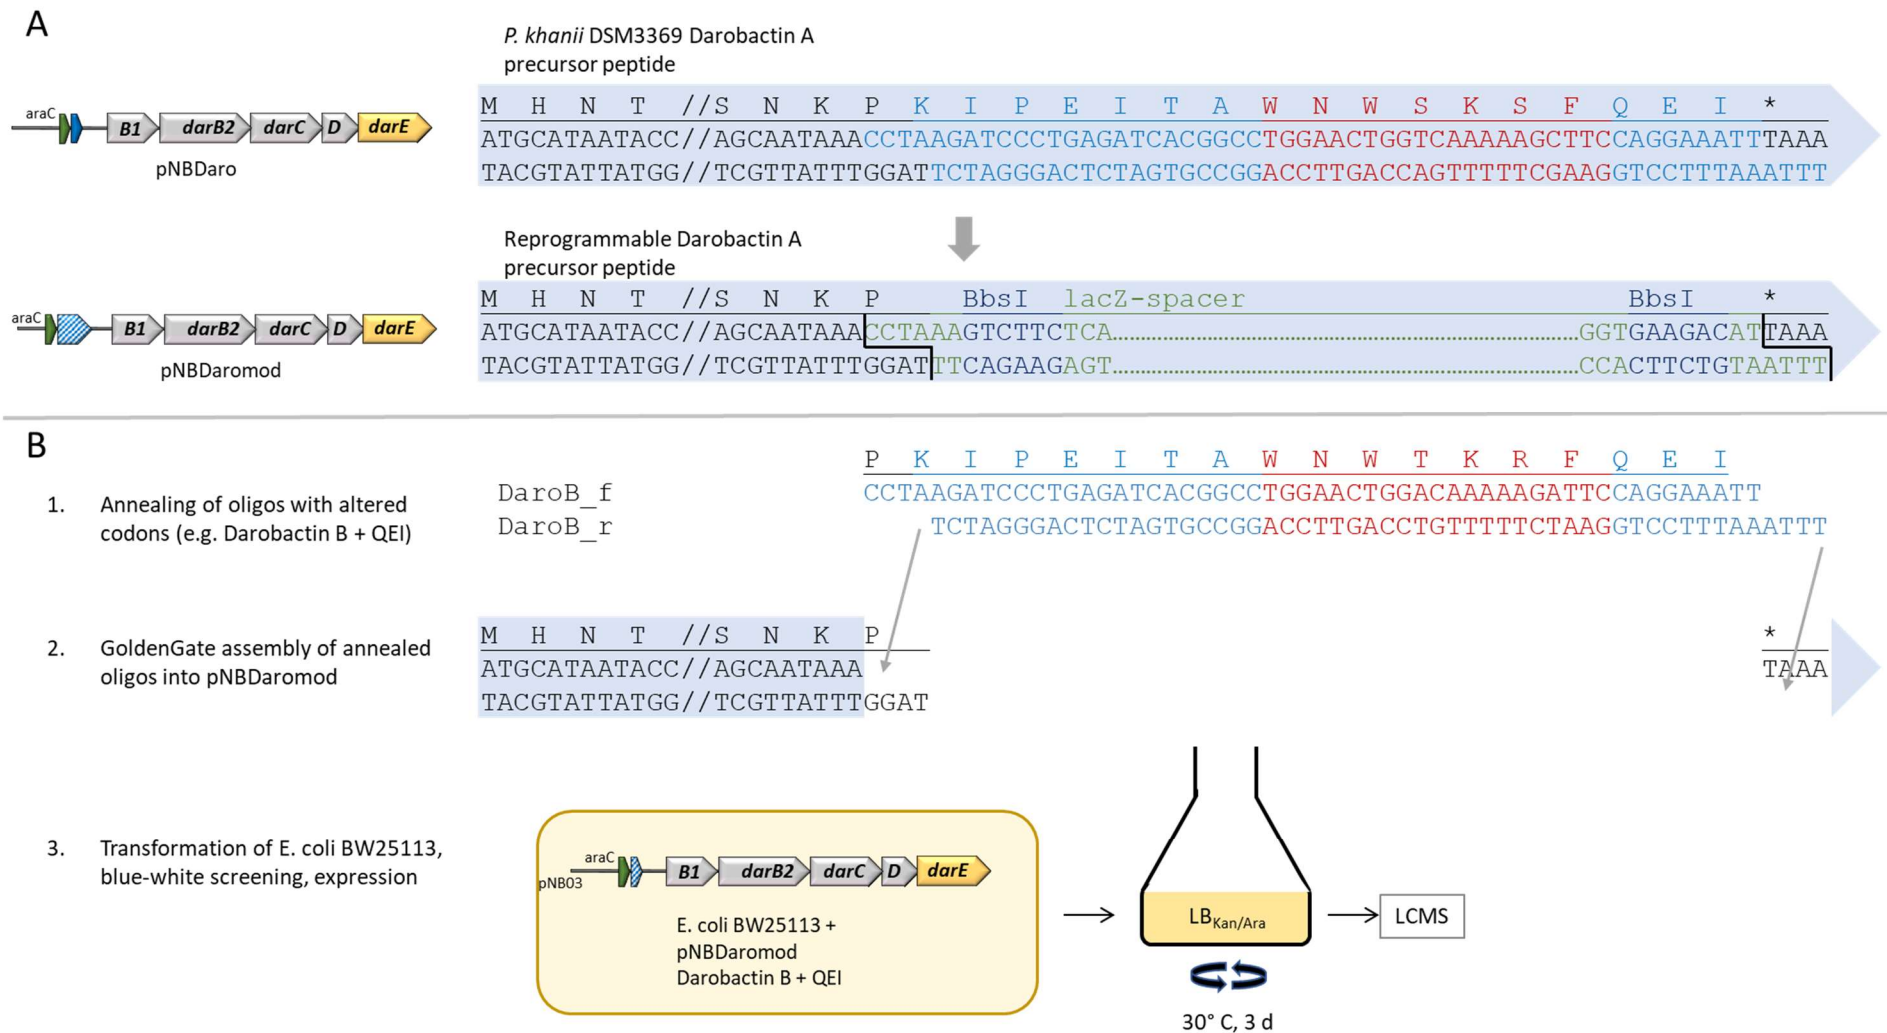

210  
211  
212  
213

**Figure S1:** General cloning strategy for exchange of core AAs in the DAR A precursor. A) replacement of the core AAs with a pCRISPOMYCES2 derived lacZ spacer. B) individual replacement of core AAs in the DAR A precursor by GoldenGate assembly using annealed synthesized oligonucleotides and subsequent cultivation of strains carrying modified plasmids.

214  
215

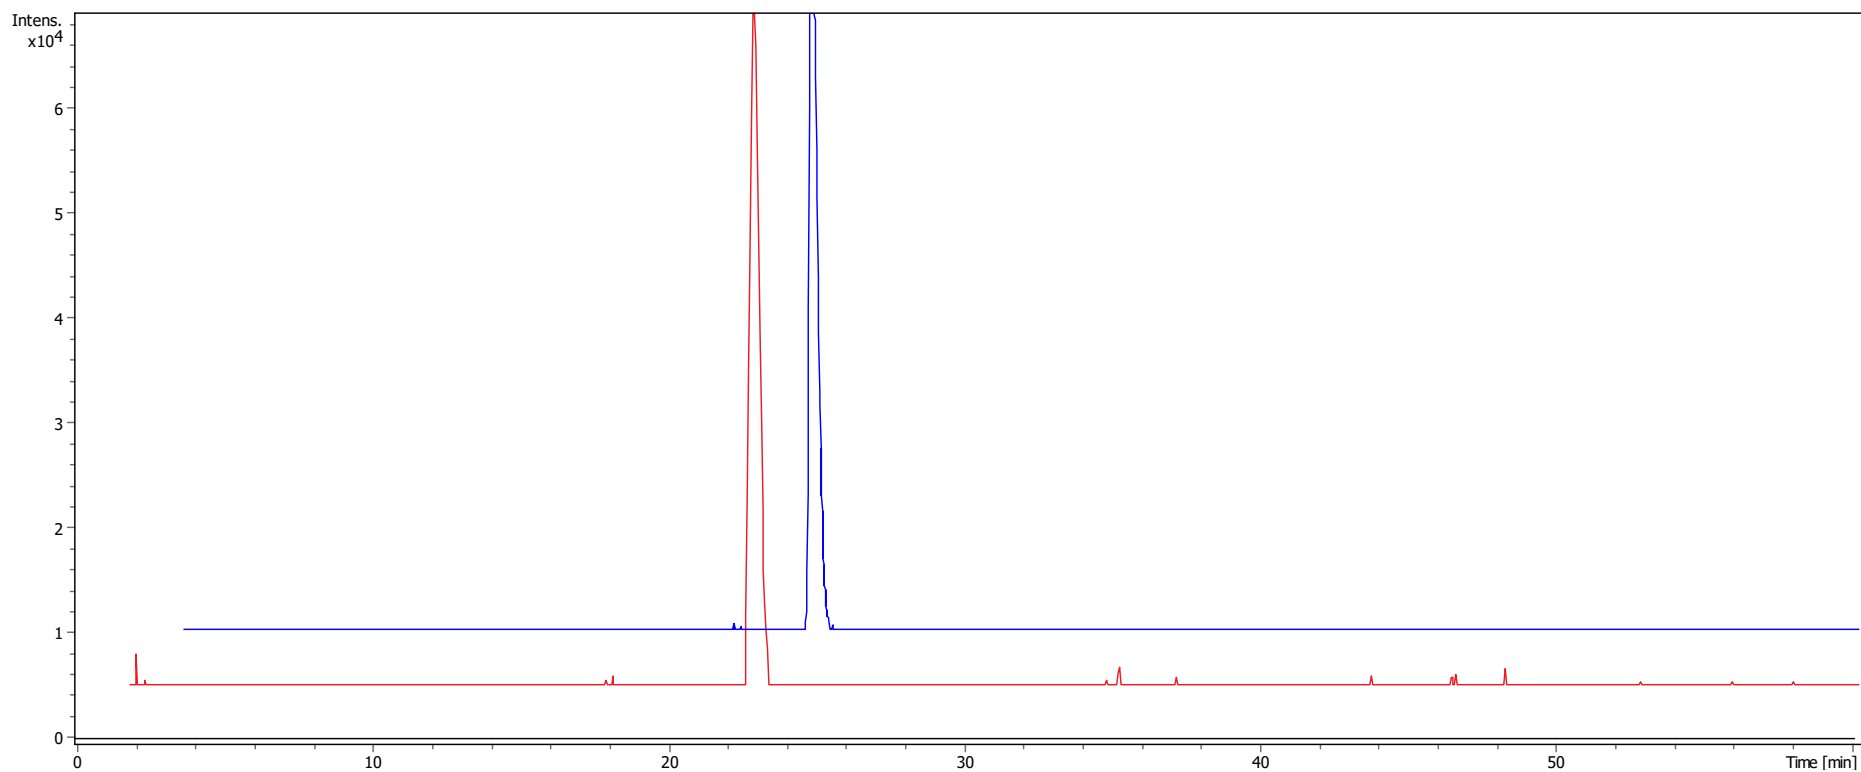

216  
217  
218  
219  
220

**Figure S2A:** Extracted ion chromatogram (EICs, calcd.  $[M + 2H]^{2+} \pm 0.01$  Da) of DAR A ( $483.7089$   $m/z$ ) for *E. coli* BW25113 + pNBDarC (- ctrl, black) *E. coli* BW25113 + pNB03-darA-E (incl. follower, red, Imai *et al.*, 2019) and *E. coli* BW25113 + pNBDarA (- follower, blue).



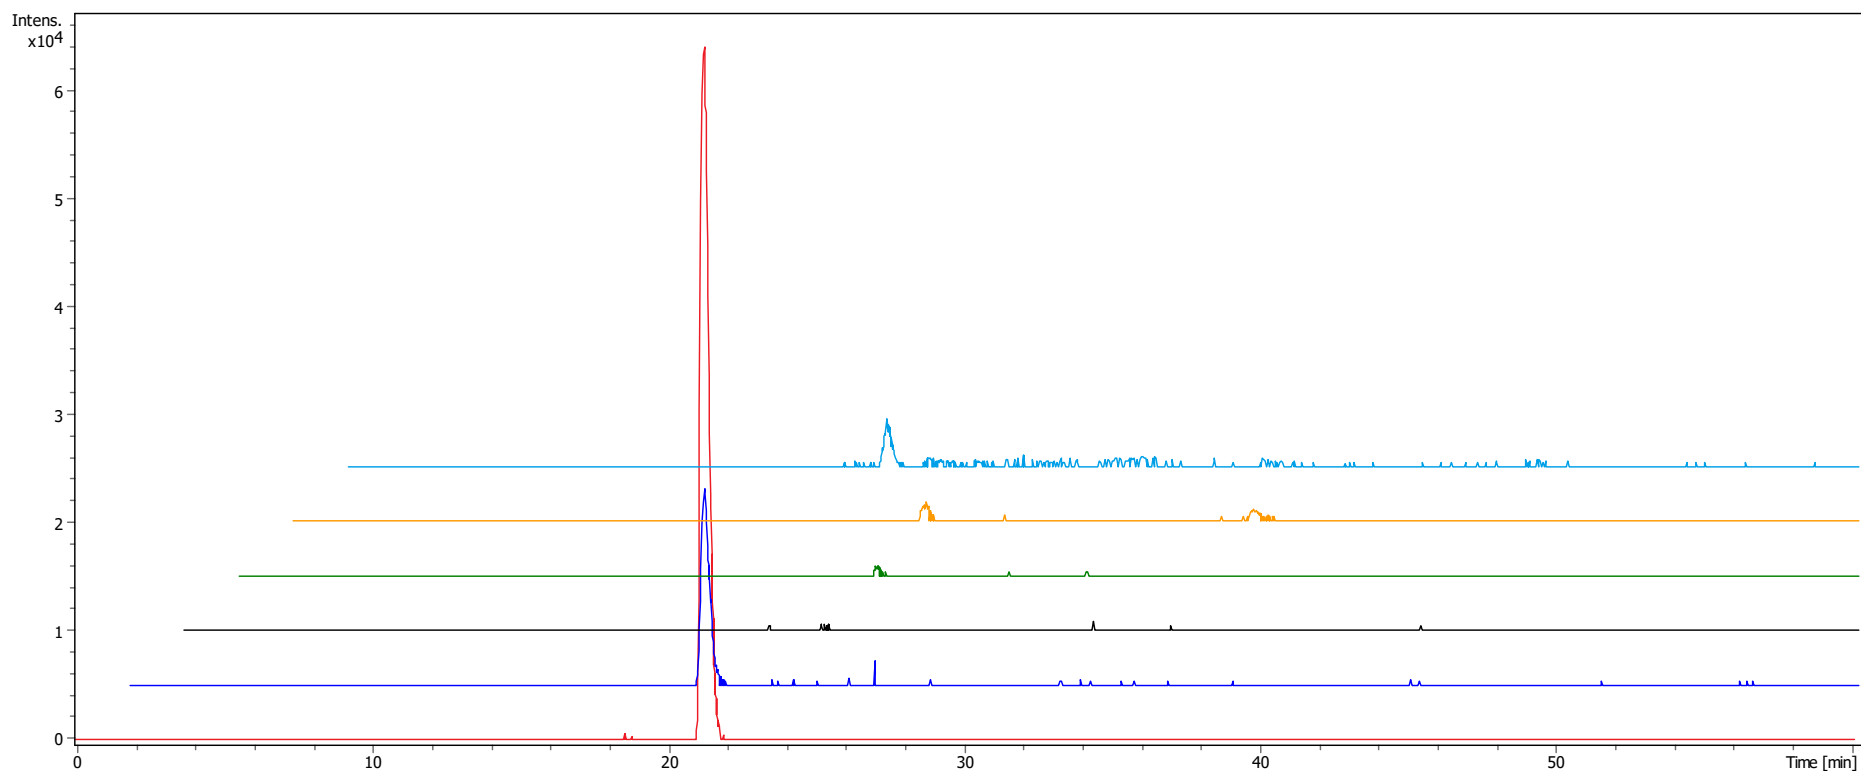

221  
222 **Figure S2B:** Extracted ion chromatograms (EICs, calcd.  $[M + 2H]^{2+} \pm 0.01$  Da) of DAR A (483.7089  $m/z$ ) and the DAR analogues B  
223 (525.2512  $m/z$ ), C (484.2065  $m/z$ ), D (497.7119  $m/z$ ), E (470.2034  $m/z$ ) and F (487.2482  $m/z$ ) from bottom to top.  
224

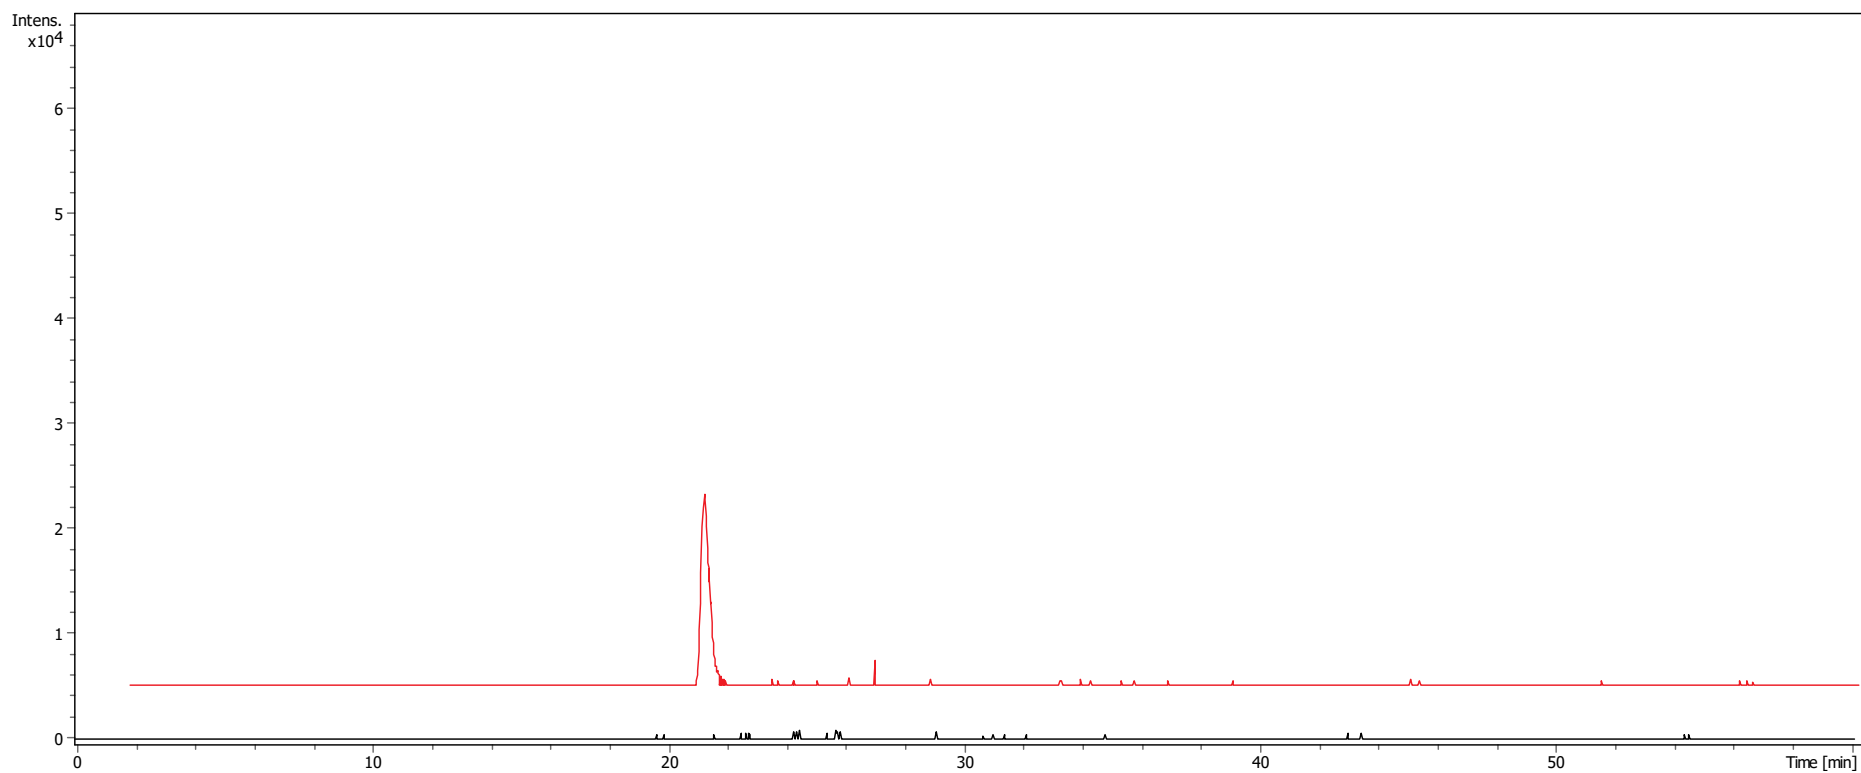

225  
226 **Figure S2C:** Extracted ion chromatogram (EICs, calcd.  $[M + 2H]^{2+} \pm 0.01$  Da) of DAR B (525.2512  $m/z$ ) for *E. coli* BW25113 +  
227 pNBDarA (- ctrl, black) and *E. coli* BW25113 + pNBDarB (red).  
228

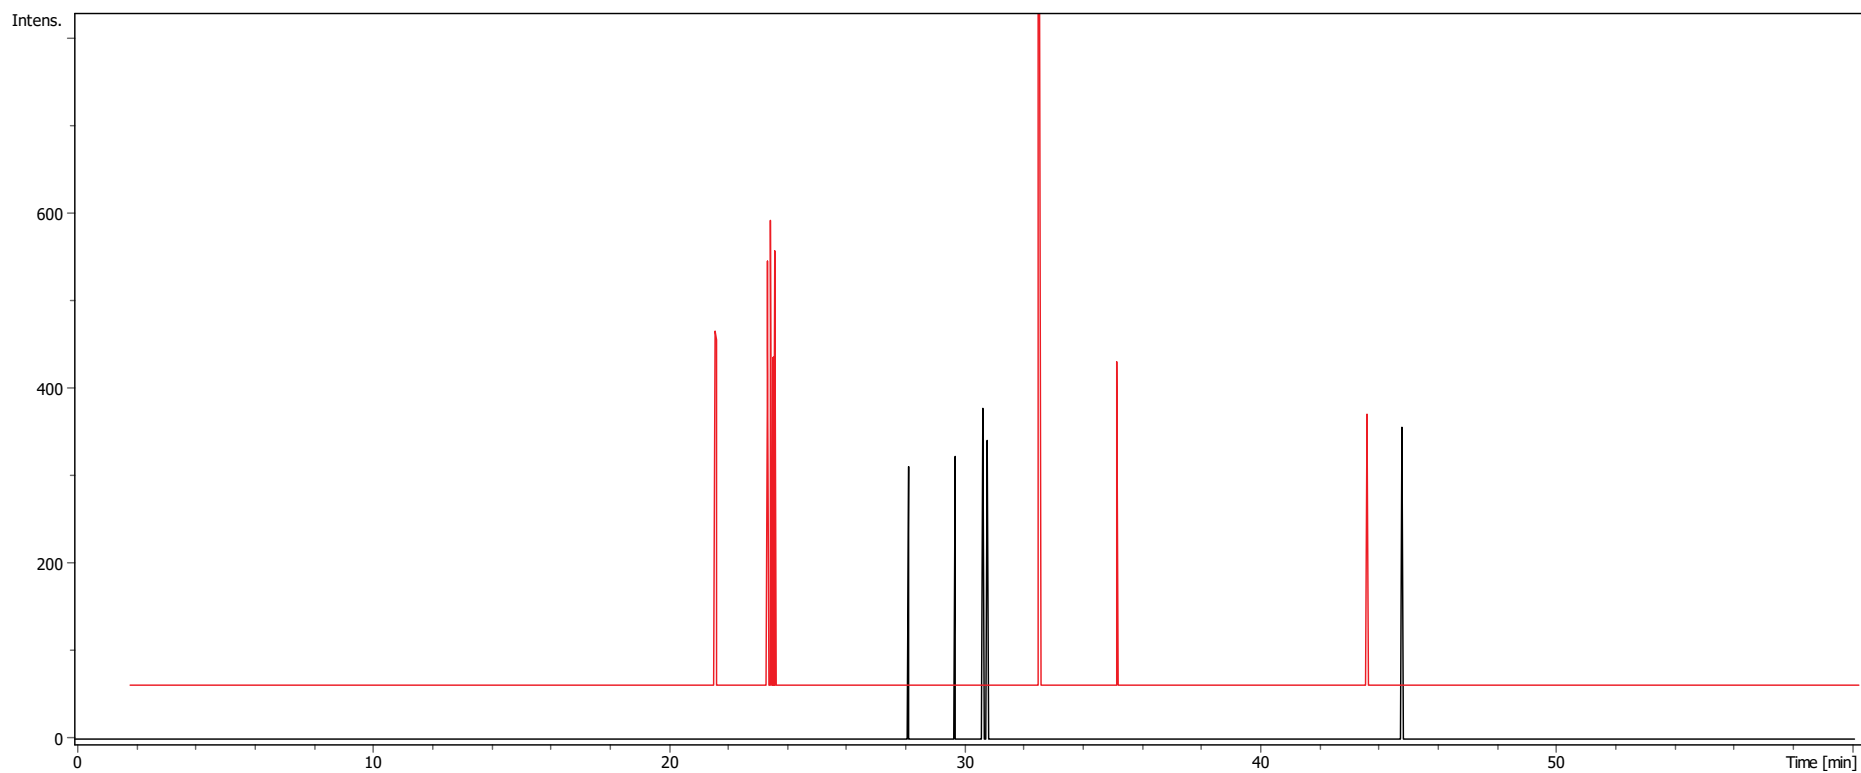

229  
230  
231  
232

**Figure S2D:** Extracted ion chromatogram (EICs, calcd.  $[M + 2H]^{2+} \pm 0.01$  Da) of DAR C (484.2065  $m/z$ ) for *E. coli* BW25113 + pNBDarD (- ctrl, black) and *E. coli* BW25113 + pNBDarC (red).

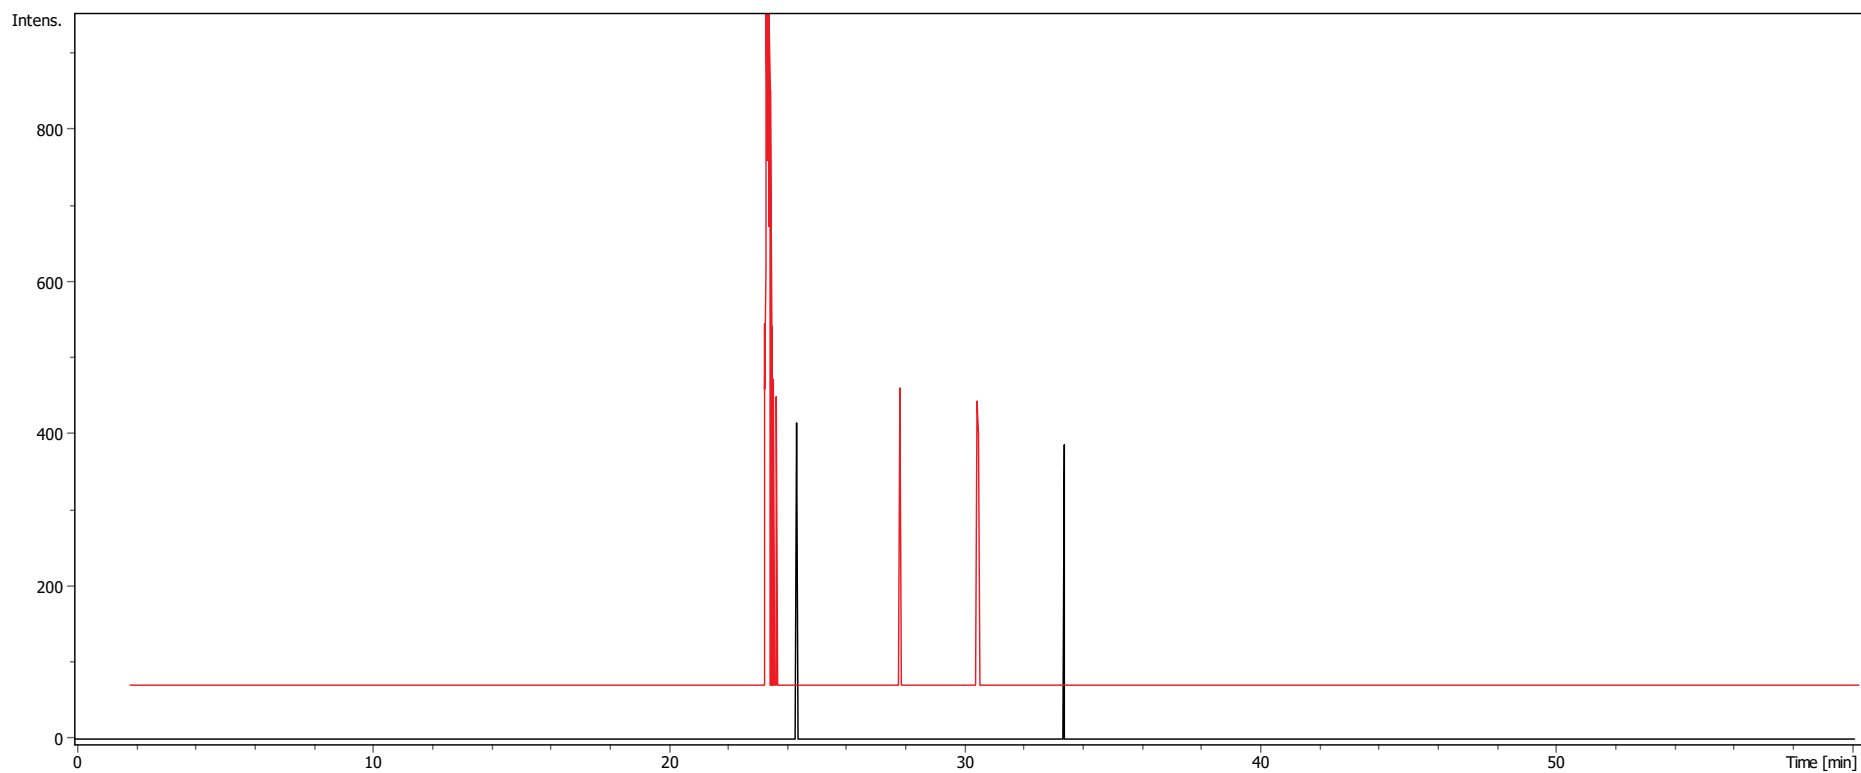

233  
234 **Figure S2E:** Extracted ion chromatogram (EICs, calcd.  $[M + 2H]^{2+} \pm 0.01$  Da) of DAR D (497.7119  $m/z$ ) for *E. coli* BW25113 +  
235 pNBDarA (- ctrl, black) and *E. coli* BW25113 + pNBDarD (red).  
236

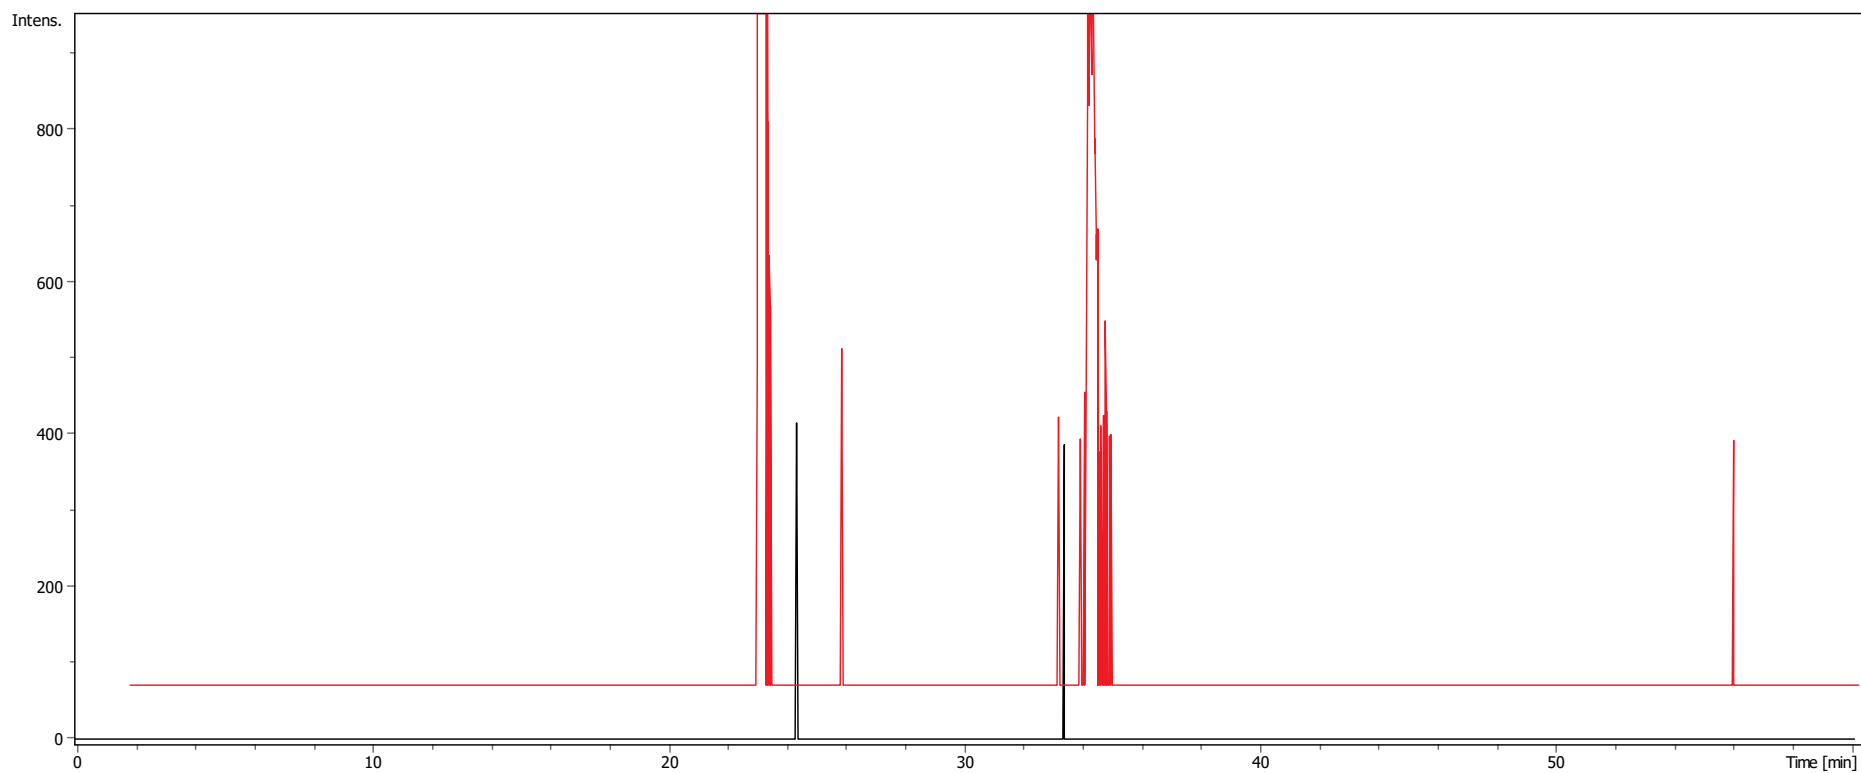

237  
238 **Figure S2F:** Extracted ion chromatogram (EICs, calcd.  $[M + 2H]^{2+} \pm 0.01$  Da) of DAR E (470.2034  $m/z$ ) for *E. coli* BW25113 +  
239 pNBDarA (- ctrl, black) and *E. coli* BW25113 + pNBDarE (red).  
240

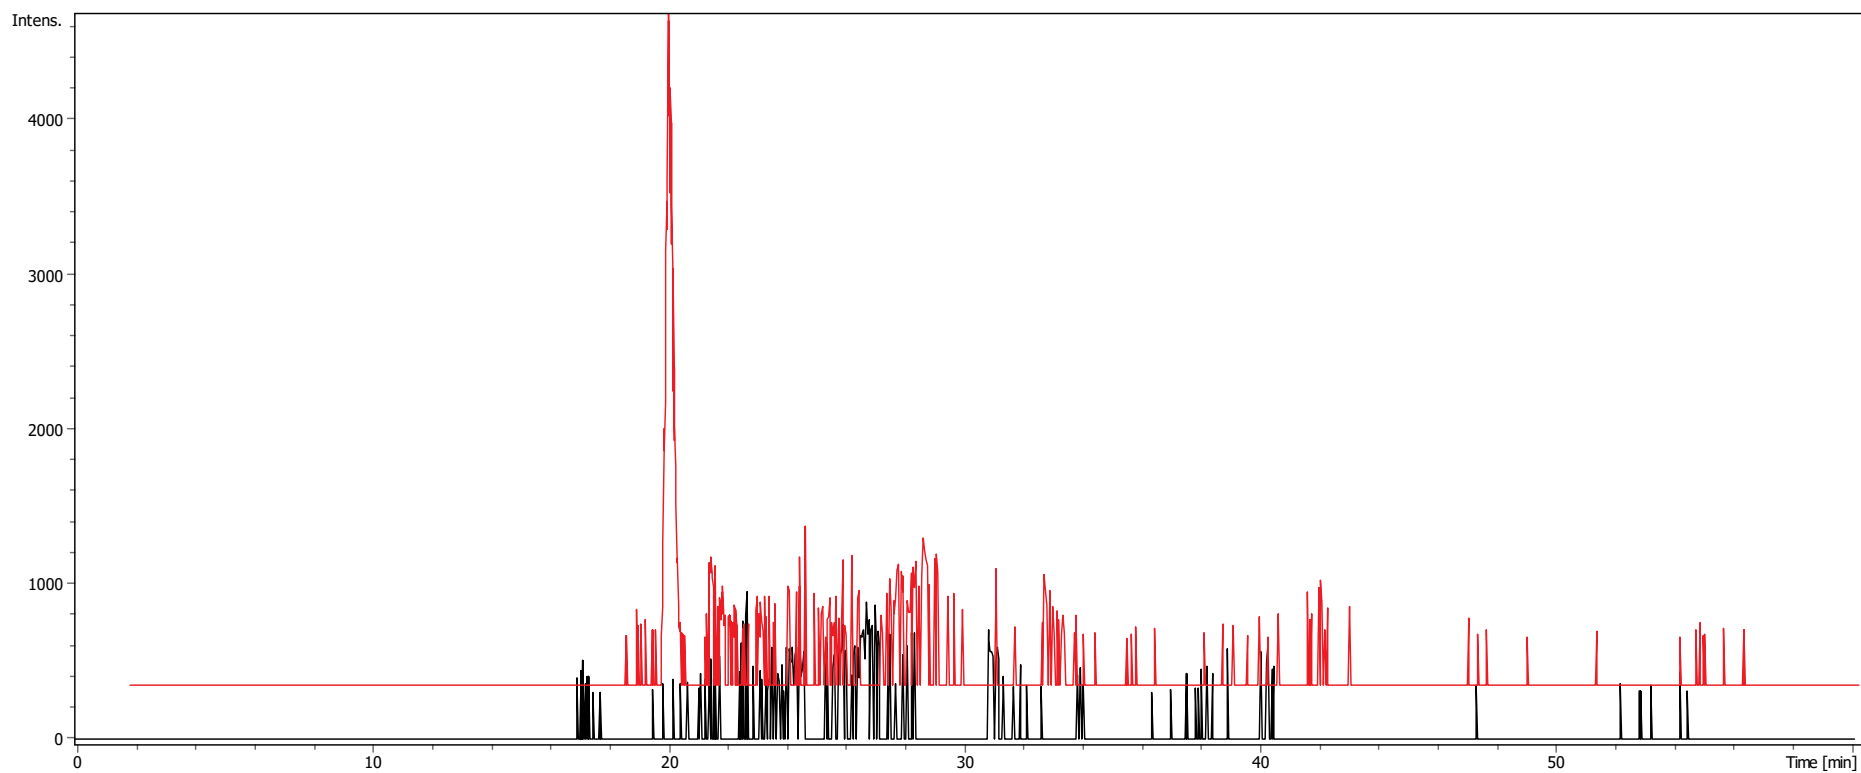

241  
242 **Figure S2G:** Extracted ion chromatogram (EICs, calcd.  $[M + 2H]^{2+} \pm 0.01$  Da) of DAR F (487.2482  $m/z$ ) for *E. coli* BW25113 +  
243 pNBDarA (- ctrl, black) and *E. coli* BW25113 + pNBDarF (red).  
244

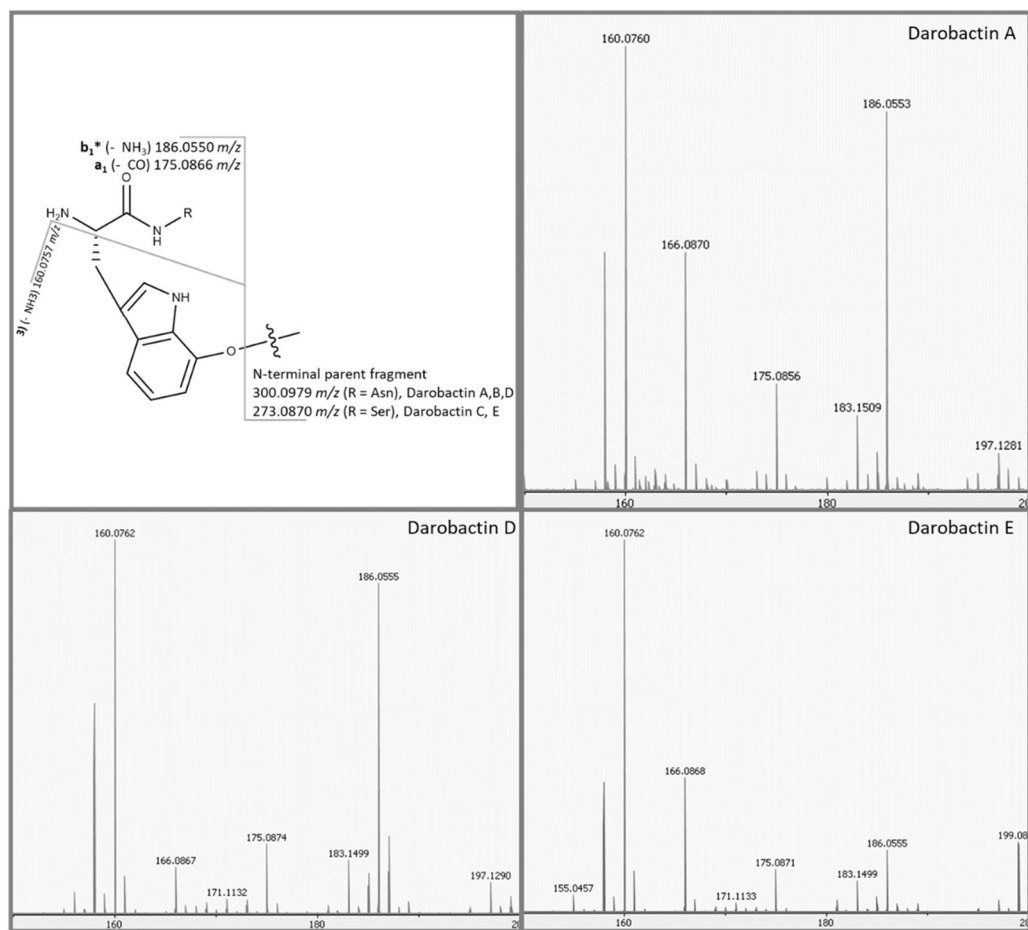

245  
246  
247  
248

**Figure S3A:** Structure of the N-terminal W of Darobactin Analogues with plausible MS/MS fragmentation pattern and MS/MS spectra of Darobactin A, D and E. Respective measured fragment ions are annotated. Darobactin B was measured on a different instrument that did not measure < 200 *m/z*.

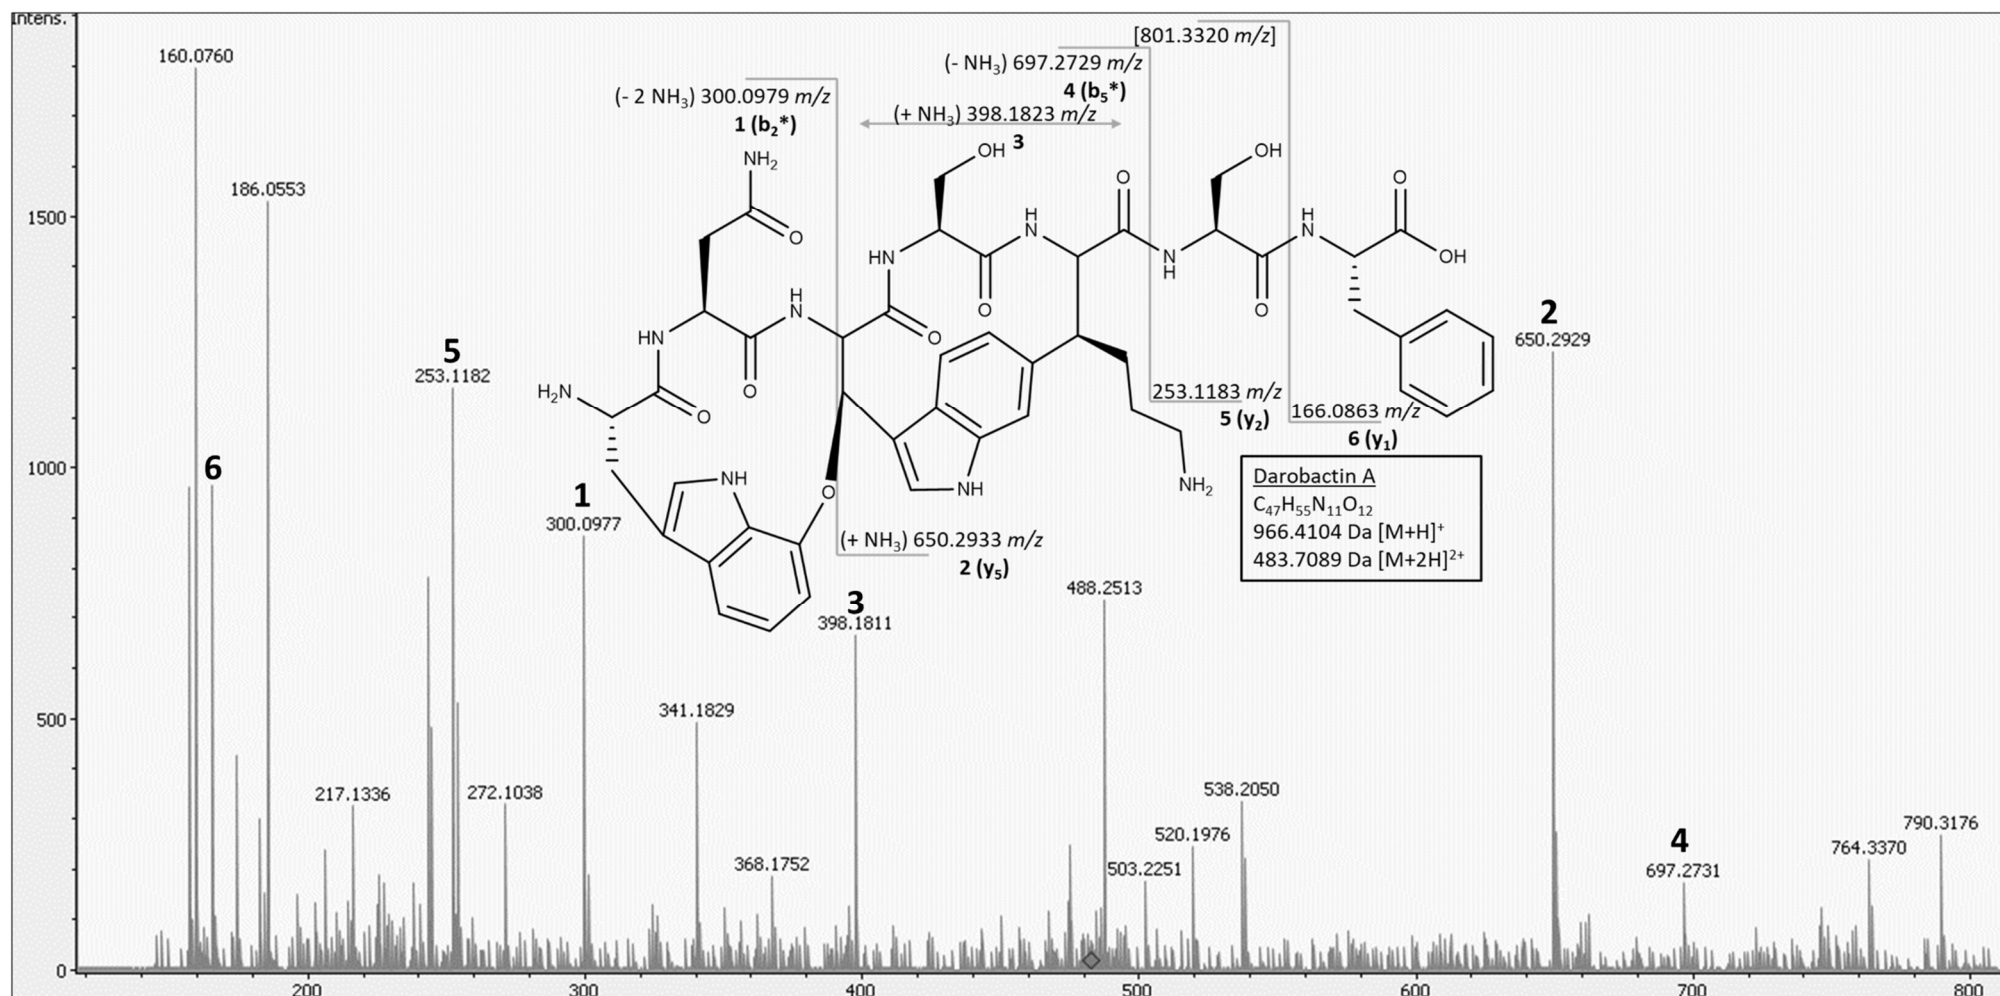

249 **Figure S3B:** Structure, sum formula and theoretical exact mass of Darobactin A with plausible MS/MS fragmentation pattern and  
 250 MS/MS spectrum. The respective measured fragment ions that correspond to the shown fragmentation pattern are annotated.  
 251  
 252



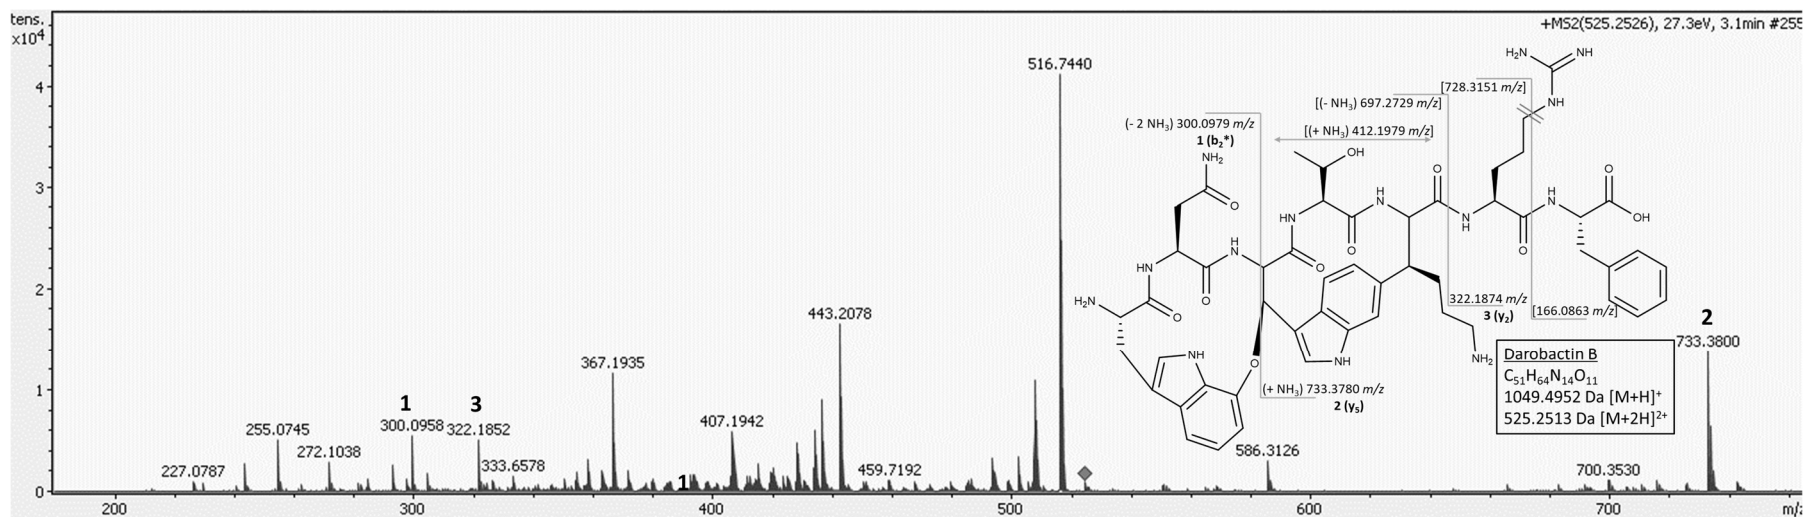

253  
254  
255  
256

**Figure S3C:** Structure, sum formula and theoretical exact mass of Darobactin B with plausible MS/MS fragmentation pattern and MS/MS spectrum. The respective measured fragment ions that correspond to the shown fragmentation pattern are annotated.

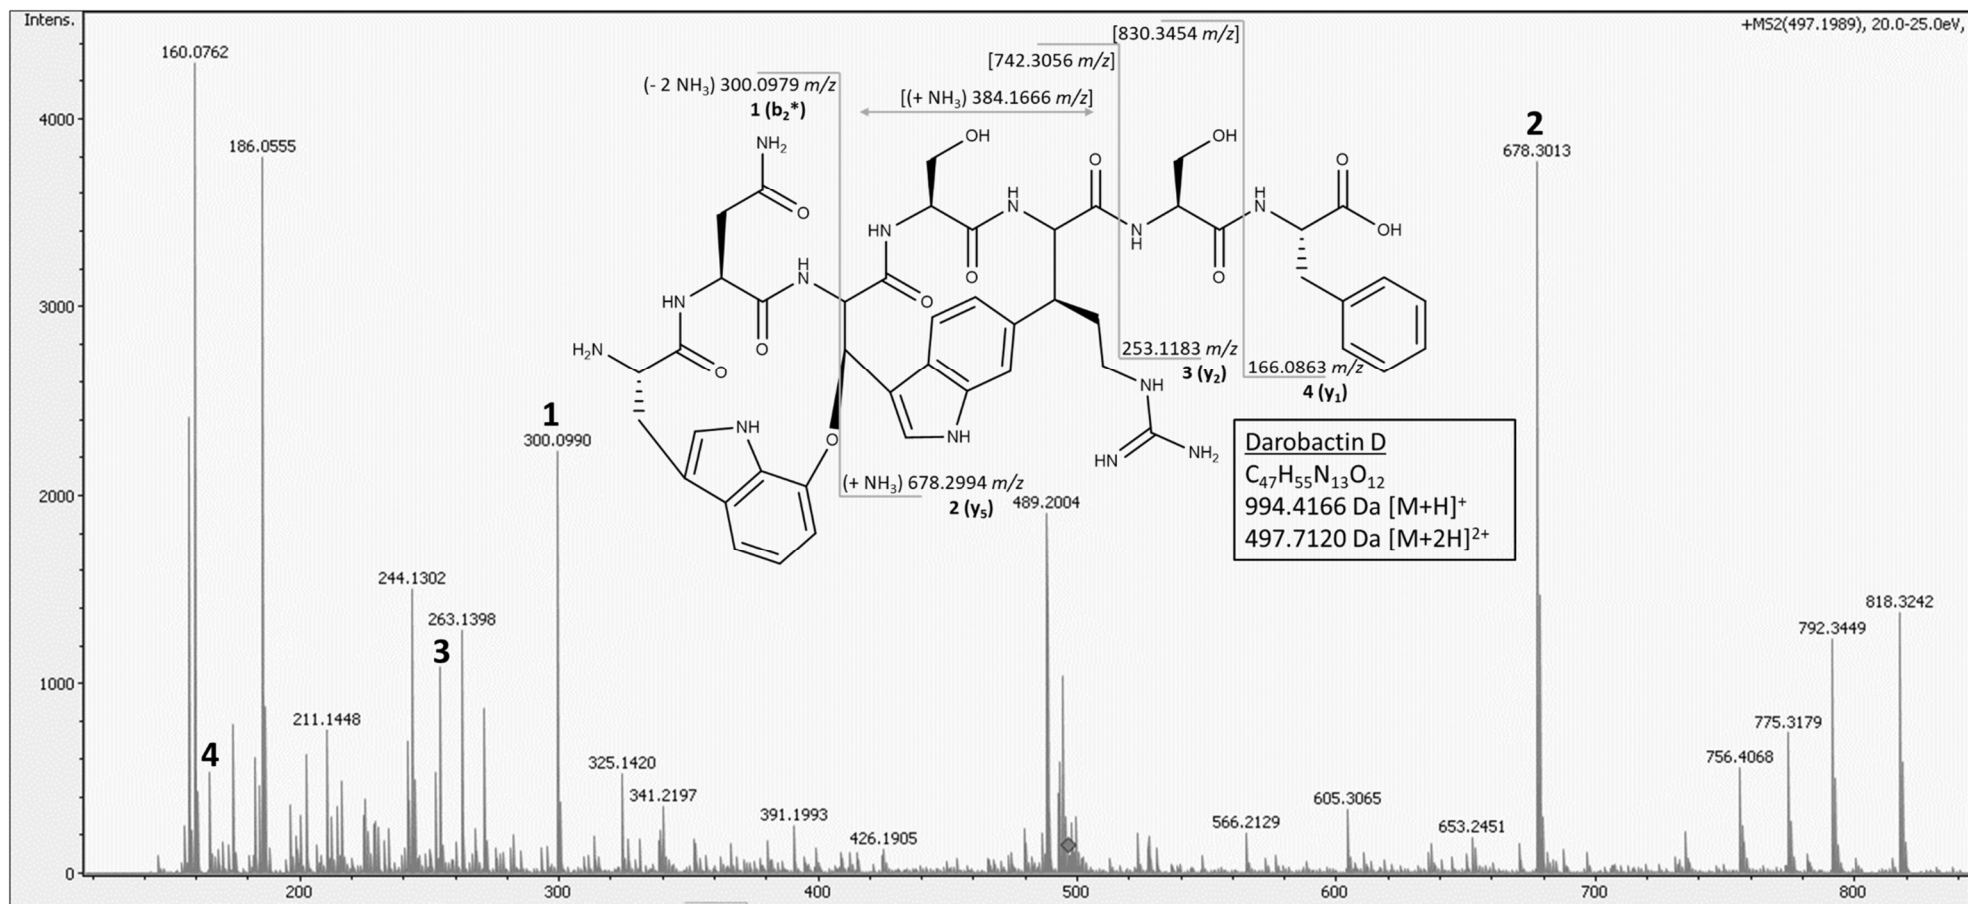

257  
258  
259  
260

**Figure S3D:** Structure, sum formula and theoretical exact mass of Darobactin D with plausible MS/MS fragmentation pattern and MS/MS spectrum. The respective measured fragment ions that correspond to the shown fragmentation pattern are annotated.

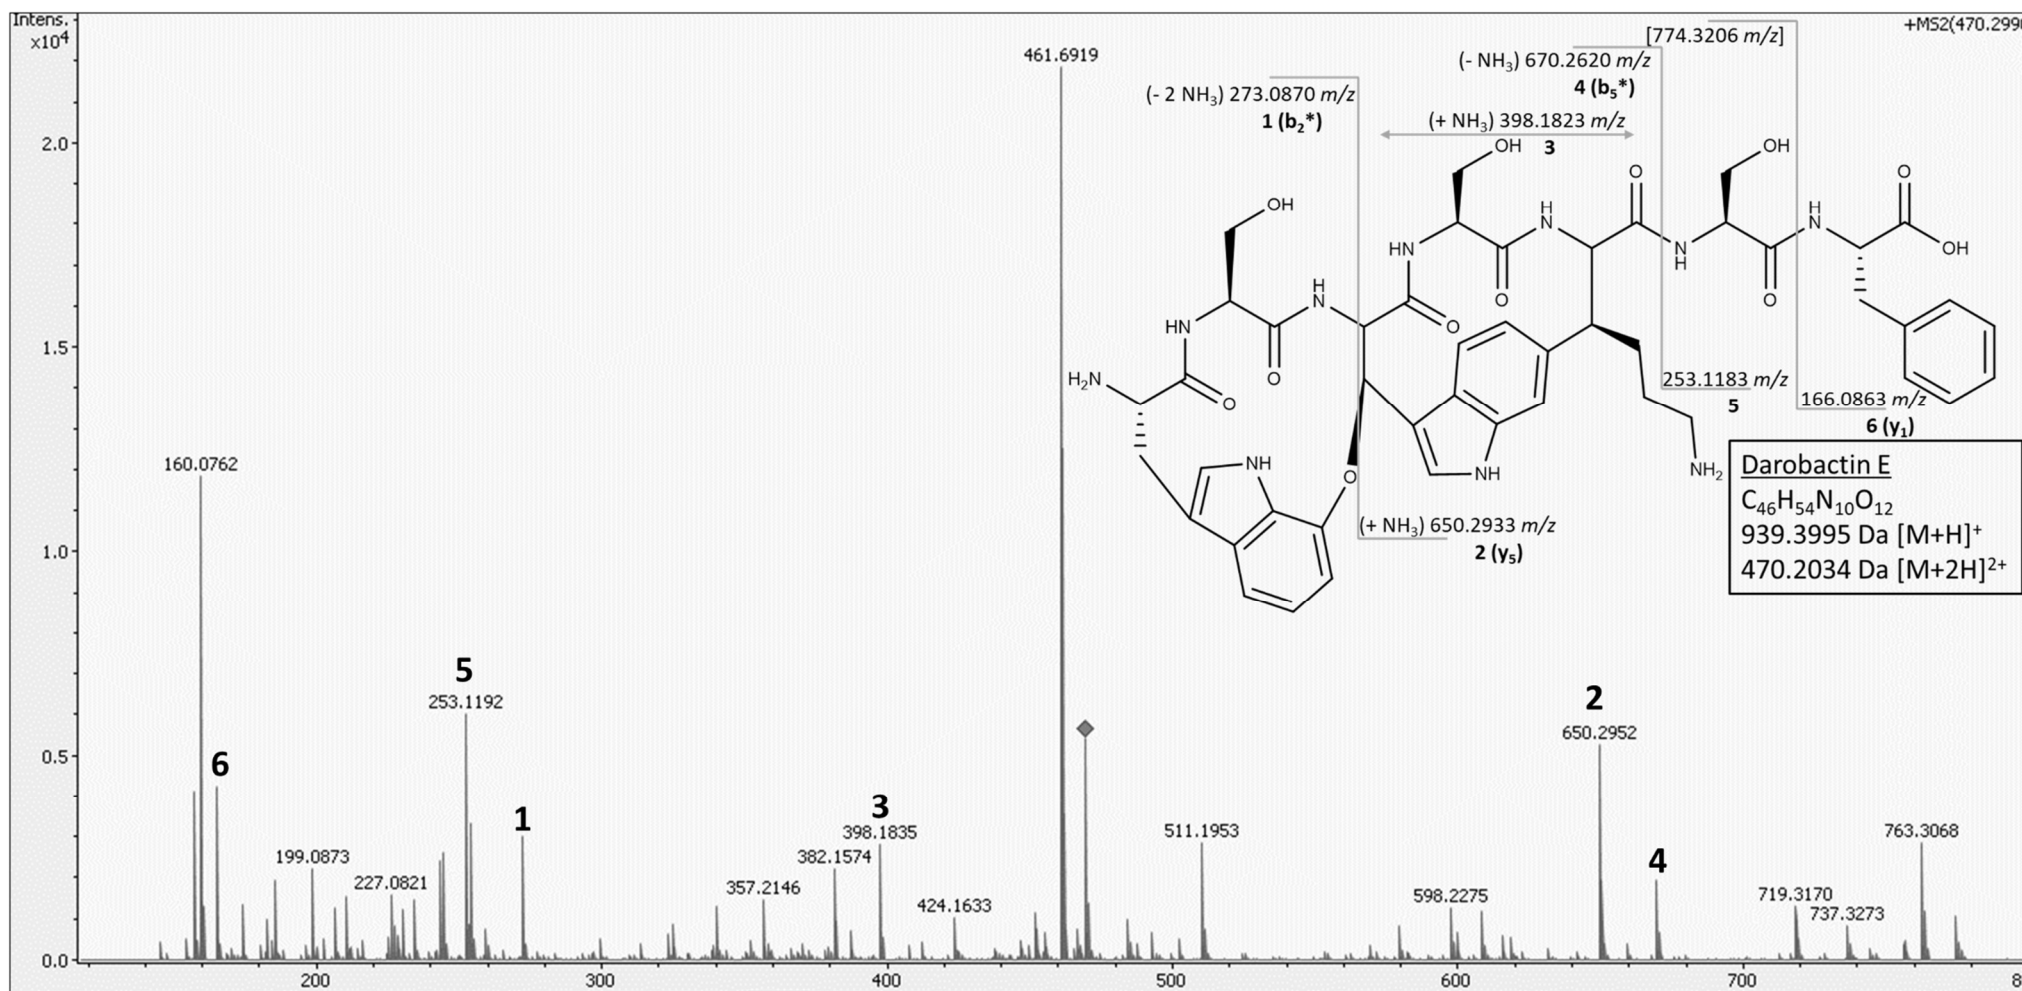

261  
 262  
 263  
 264  
 265  
 266

**Figure S3E:** Structure, sum formula and theoretical exact mass of Darobactin E with plausible MS/MS fragmentation pattern and MS/MS spectrum. The respective measured fragment ions that correspond to the shown fragmentation pattern are annotated.

267 **Table S1:** <sup>1</sup>H (600 MHz) and <sup>13</sup>C (150 MHz) NMR data of Darobactin B (D<sub>2</sub>O; δ in ppm) alongside correlation data from HMBC  
 268 measurement. For <sup>13</sup>C measurements 3-(trimethylsilyl)propionic-2,2,3,3-d<sub>4</sub> acid sodium salt (TSPA) was used as external standard.  
 269 For atom numbering cf. Figure S4.  
 270

| Amino acid       | Position               | δ <sub>c</sub> [ppm], Type | δ <sub>H</sub> [ppm],<br>Mult. (J in Hz), J        | HMBC coupling with (δ <sub>c</sub> in ppm, corresponding amino acid)   |
|------------------|------------------------|----------------------------|----------------------------------------------------|------------------------------------------------------------------------|
| Trp (N-terminal) | 1                      | 59.11, CH                  | 4.08, dd (7.29, 10.95), 1H                         | 2 (30.72, Trp), 11 (172.64, Trp)                                       |
|                  | 2                      | 30.72, CH <sub>2</sub>     | 3.60, dd (7.20, 13.68), 1H;<br>3.35, d (12.94), 1H | Trp 1 (59.11), Trp 3 (112.56), Trp 10 (133.46), Trp 11 (172.64)        |
|                  | 3                      | 112.56, C <sub>q</sub>     | -                                                  |                                                                        |
|                  | 4                      | 129.15, CH                 | 7.43 – 7.36, m, 1H <sup>[a]</sup>                  | 3 (112.56, Trp), 5 (133.50, Trp) or / and 10 (133.46, Trp)             |
|                  | 5                      | 133.50, C <sub>q</sub>     | -                                                  |                                                                        |
|                  | 6                      | 149.59, C <sub>q</sub>     | -                                                  |                                                                        |
|                  | 7 + 9                  | 118.24, CH;<br>113.45, CH  | 7.30, pseudo-t (7.29), 2H                          | 5 (133.50, Trp), 6 (149.59, Trp), 7 + 9 (118.24, 113.45, both Trp)     |
|                  | 8                      | 124.68, CH                 | 7.24, t (7.74), 1H                                 | 6 (149.59, Trp), 10 (133.46, Trp)                                      |
|                  | 10                     | 133.46, C <sub>q</sub>     | -                                                  |                                                                        |
|                  | 11                     | 172.64, C <sub>q</sub>     | -                                                  |                                                                        |
| Asn              | 12                     | 55.19, CH                  | 3.37, t (6.84), 2H (expected: 1H)                  | 11 (172.64, Trp), 13 (43.29, Asn), 14 (178.12, Asn), 15 (172.97, Asn), |
|                  | 13                     | 43.29, CH <sub>2</sub>     | 2.24 - 2.17, m, 2H                                 | 12 (55.19, Asn), 14 (178.12, Asn), 15 (172.97, Asn)                    |
|                  | 14                     | 178.12, C <sub>q</sub>     | -                                                  |                                                                        |
|                  | 15                     | 172.97, C <sub>q</sub>     | -                                                  |                                                                        |
| Trp              | 16                     | 67.81, CH                  | 4.74, d (9.00), 1H                                 | 15 (172.97, Asn), 17 (81.34, Trp), 26 (172.59, Trp)                    |
|                  | 17                     | 81.34, CH                  | 6.24, d (8.94), 1H                                 | 6 (149.59, Trp), 18 (116.09, Trp), 19 (128.88, Trp)                    |
|                  | 18                     | 116.09, C <sub>q</sub>     | -                                                  |                                                                        |
|                  | 19                     | 128.88, CH                 | 7.90, s, 1H                                        | 18 (116.09, Trp), 20 (141.58, Trp), 25 (129.28, Trp)                   |
|                  | 20                     | 141.58, C <sub>q</sub>     | -                                                  |                                                                        |
|                  | 21                     | 114.95, CH                 | 7.51, s, 1H                                        | 25 (129.28, Trp), 32 (52.40, Lys)                                      |
|                  | 22                     | 137.41, C <sub>q</sub>     | -                                                  |                                                                        |
|                  | 23                     | 129.34, CH                 | 6.99, dd (0.99, 8.37), 1H                          | 21 (114.95, Trp), 25 (129.28, Trp), 32 (52.40, Lys)                    |
|                  | 24                     | 121.87, CH                 | 7.50 – 7.45, m, 1H <sup>[b]</sup>                  | 18 (116.09, Trp), 20 (141.58, Trp), 22 (137.41, Trp)                   |
|                  | 25                     | 129.28, C <sub>q</sub>     | -                                                  |                                                                        |
| 26               | 172.59, C <sub>q</sub> | -                          |                                                    |                                                                        |

**Table S1 (continued)**

| Amino acid | Position | $\delta_C$ [ppm], Type | $\delta_H$ [ppm], Mult. ( <i>J</i> in Hz), $\int$            | HMBC coupling with ( $\delta_C$ in ppm, corresponding amino acid)           |
|------------|----------|------------------------|--------------------------------------------------------------|-----------------------------------------------------------------------------|
| Thr        | 27       | 62.52, CH              | 3.77, d (6.48), 1H                                           | 26 (172.59, Trp) or/ and 30 (172.40, Thr), 28 (72.46, Thr), 29 (22.73, Thr) |
|            | 28       | 72.46, CH              | 3.43, p (6.38), 1H                                           | -                                                                           |
|            | 29       | 22.73, CH <sub>3</sub> | 0.83, d (6.42), 3H                                           | 27 (62.52, Thr), 28 (72.46, Thr)                                            |
|            | 30       | 172.40, C <sub>q</sub> | -                                                            | -                                                                           |
| Lys        | 31       | 64.51, CH              | 4.22, d (10.56), 1H                                          | 30 (172.40, Thr), 32 (52.40, Lys), 33 (30.13, Lys), 36 (175.85, Lys)        |
|            | 32       | 52.40, CH              | 3.10 – 3.00, m, 1H <sup>[c]</sup>                            | -                                                                           |
|            | 33       | 30.13, CH <sub>2</sub> | 2.16 – 2.09, m, 1H;<br>1.72 – 1.64, m, 1H <sup>[d]</sup>     | -                                                                           |
|            | 34       | 30.01, CH <sub>2</sub> | 1.98 – 1.89, m, 1H;<br>1.85 – 1.77, m, 1H                    | -                                                                           |
|            | 35       | 43.84, CH <sub>2</sub> | 3.10 – 3.00, m, 2H <sup>[c]</sup>                            | -                                                                           |
|            | 36       | 175.85, C <sub>q</sub> | -                                                            | -                                                                           |
| Arg        | 37       | 57.81, CH              | 4.34, dd (6.12, 8.52), 1H                                    | 36 (175.85, Lys), 38 (32.73, Arg), 39 (28.83, Arg), 42 (177.43, Arg)        |
|            | 38       | 32.73, CH <sub>2</sub> | 1.77 – 1.72, m, 1H;<br>1.72 – 1.64, m, 1H <sup>[d]</sup>     | 37 (57.81, Arg), 40 (44.88, weak, Arg)                                      |
|            | 39       | 28.83, CH <sub>2</sub> | 1.58 – 1.45, m, 3H<br>(expected: 2H)                         | 37 (57.81, weak, Arg), 40 (44.88, Arg)                                      |
|            | 40       | 44.88, CH <sub>2</sub> | 3.14, t (7.20), 2H                                           | 38 (32.73, Arg), 39 (28.83, Arg), 41 (161.13, Arg)                          |
|            | 41       | 161.13, C <sub>q</sub> | -                                                            | -                                                                           |
|            | 42       | 177.43, C <sub>q</sub> | -                                                            | -                                                                           |
| Phe        | 43       | 58.52, CH              | 4.77, dd (5.67, 9.03), 2H<br>(expected: 1H)                  | 42 (177.43, Arg), 44 (40.99, Phe), 45 (141.07, Phe), 49 (178.98, Phe)       |
|            | 44       | 40.99, CH <sub>2</sub> | 3.33, dd (5.16, 13.90), 1H;<br>3.17, dd (8.88), 1H (overlay) | 43 (58.52, Phe), 45 (141.07, Phe), 46, 46' (133.86, Phe), 49 (178.98, Phe)  |
|            | 45       | 141.07, C <sub>q</sub> | -                                                            | -                                                                           |
|            | 46, 46'  | 133.86, CH             | 7.43 – 7.36, m, 2H <sup>[a]</sup>                            | 44 (40.99, Phe), 46, 46' (133.86, Phe), 48 (131.65, Phe)                    |
|            | 47, 47'  | 133.23, CH             | 7.50 – 7.45, m, 2H <sup>[b]</sup>                            | 45 (141.07, Phe), 47, 47' (133.23, Phe)                                     |
|            | 48       | 131.65, CH             | 7.43 – 7.36, m, 1H <sup>[a]</sup>                            | 46, 46' (133.86, Phe)                                                       |
|            | 49       | 178.98, C <sub>q</sub> | -                                                            | -                                                                           |

271 [a] The observed integral for this signal was 4H due to the overlay of the proton signals for 4 (Trp), 46 (Phe), 46' (Phe), and 48 (Phe). Thus, for each of these positions an integral of 1H was assigned.  
272 [b] The observed integral for this signal was 3H due to the overlay of the proton signals for 24 (Trp), 47 (Phe), and 47' (Phe). Thus, for each of these positions an integral of 1H was assigned. [c] The  
273 observed integral for this signal was 4H due to the overlay of the proton signals for 32 (Lys), 35 (Lys) and traces of an impurity. The expected integral for the signal would be 3H, with 1H being ascribed  
274 to 32 (Lys) and 2H being assigned to 35 (Lys). [d] The observed integral for this signal was 3H due to the overlay of the proton signals for 33 (Lys), 38 (Arg) and traces of an impurity. The expected  
275 integral for the signal would be 2H, with 1H being ascribed to 33 (Lys) and 1H being assigned to 38 (Arg).

276 **Figure S4:** Structure of Darobactin B including atom numbering for table S1.

277

278

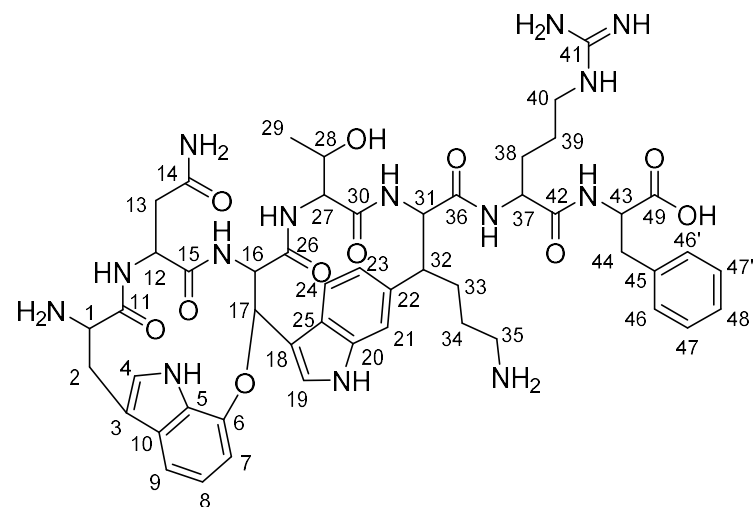

279

280

281

282 **Figure S5A:**  $^1\text{H-NMR}$  spectrum of Darobactin B (600 MHz,  $\text{D}_2\text{O}$ ).

283

284

285

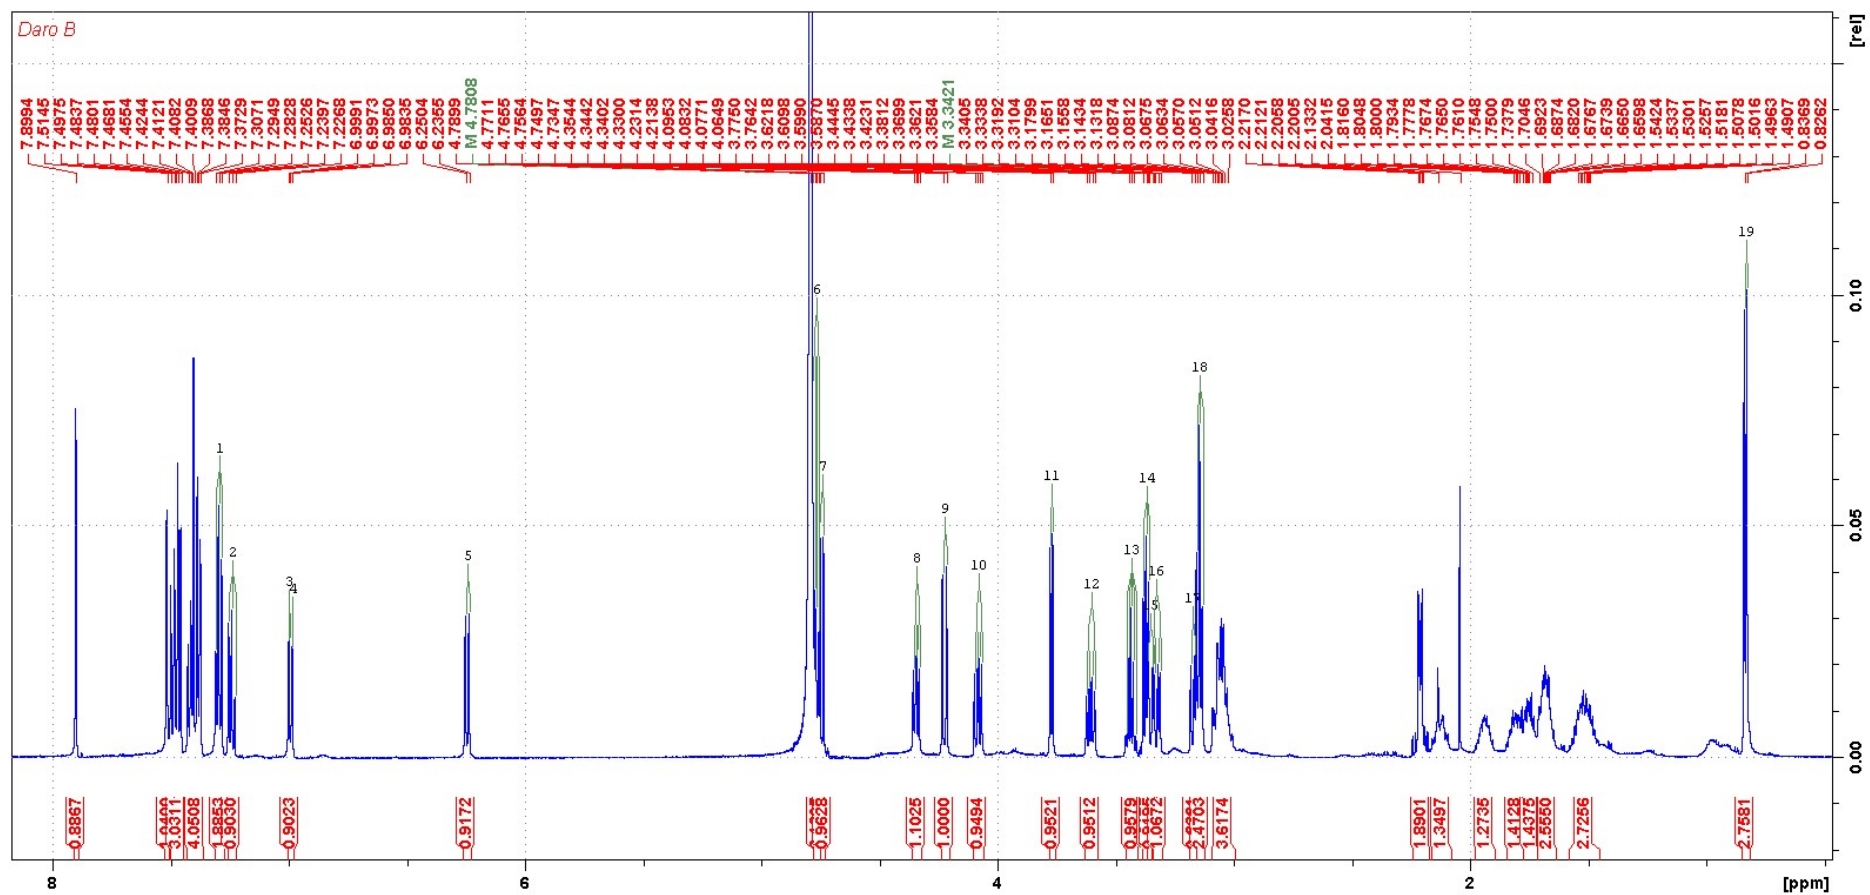

286

287

288  
289  
290  
291  
292  
293  
294  
295  
296  
297  
298  
299  
300  
301  
302  
303  
304  
305  
306  
307  
308  
309

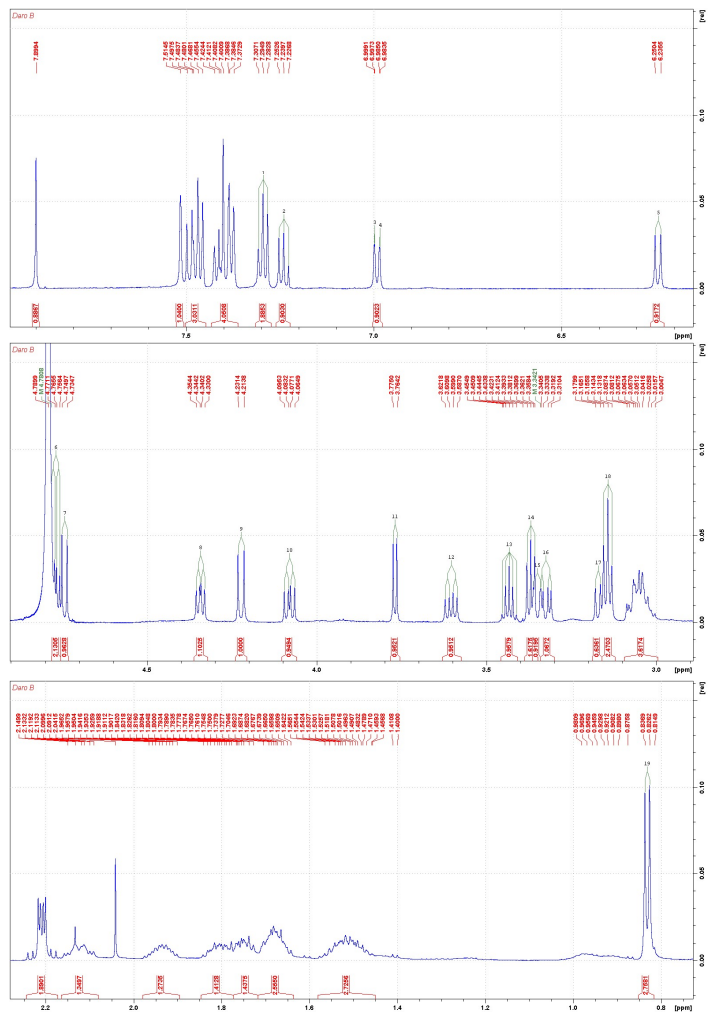

**Figure S5B:**  
Expanded <sup>1</sup>H-NMR spectrum of Darobactin B (600 MHz, D<sub>2</sub>O).



310 **Figure S5C:**  $^{13}\text{C}$ -NMR spectrum of Darobactin B (150 MHz,  $\text{D}_2\text{O}$ ). For the measurement 3-(trimethylsilyl)propionic-2,2,3,3- $\text{d}_4$  acid  
311 sodium salt (TSPA) was used as external standard. The multiplets indicate residual TFA.

312

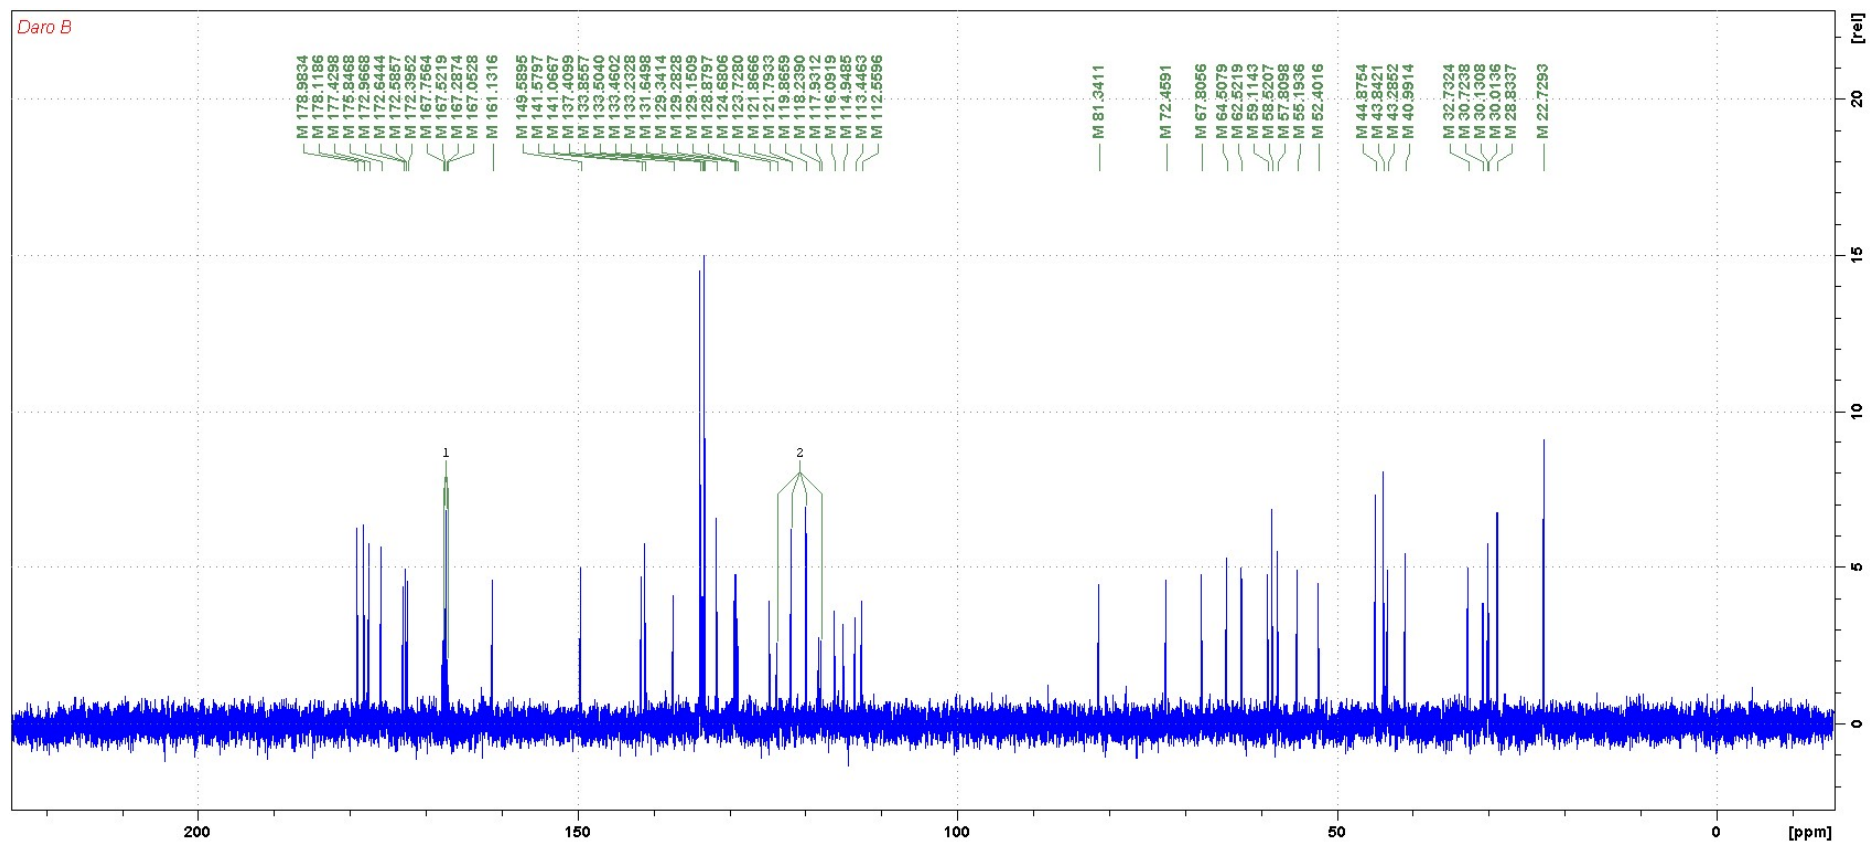

313

314

315

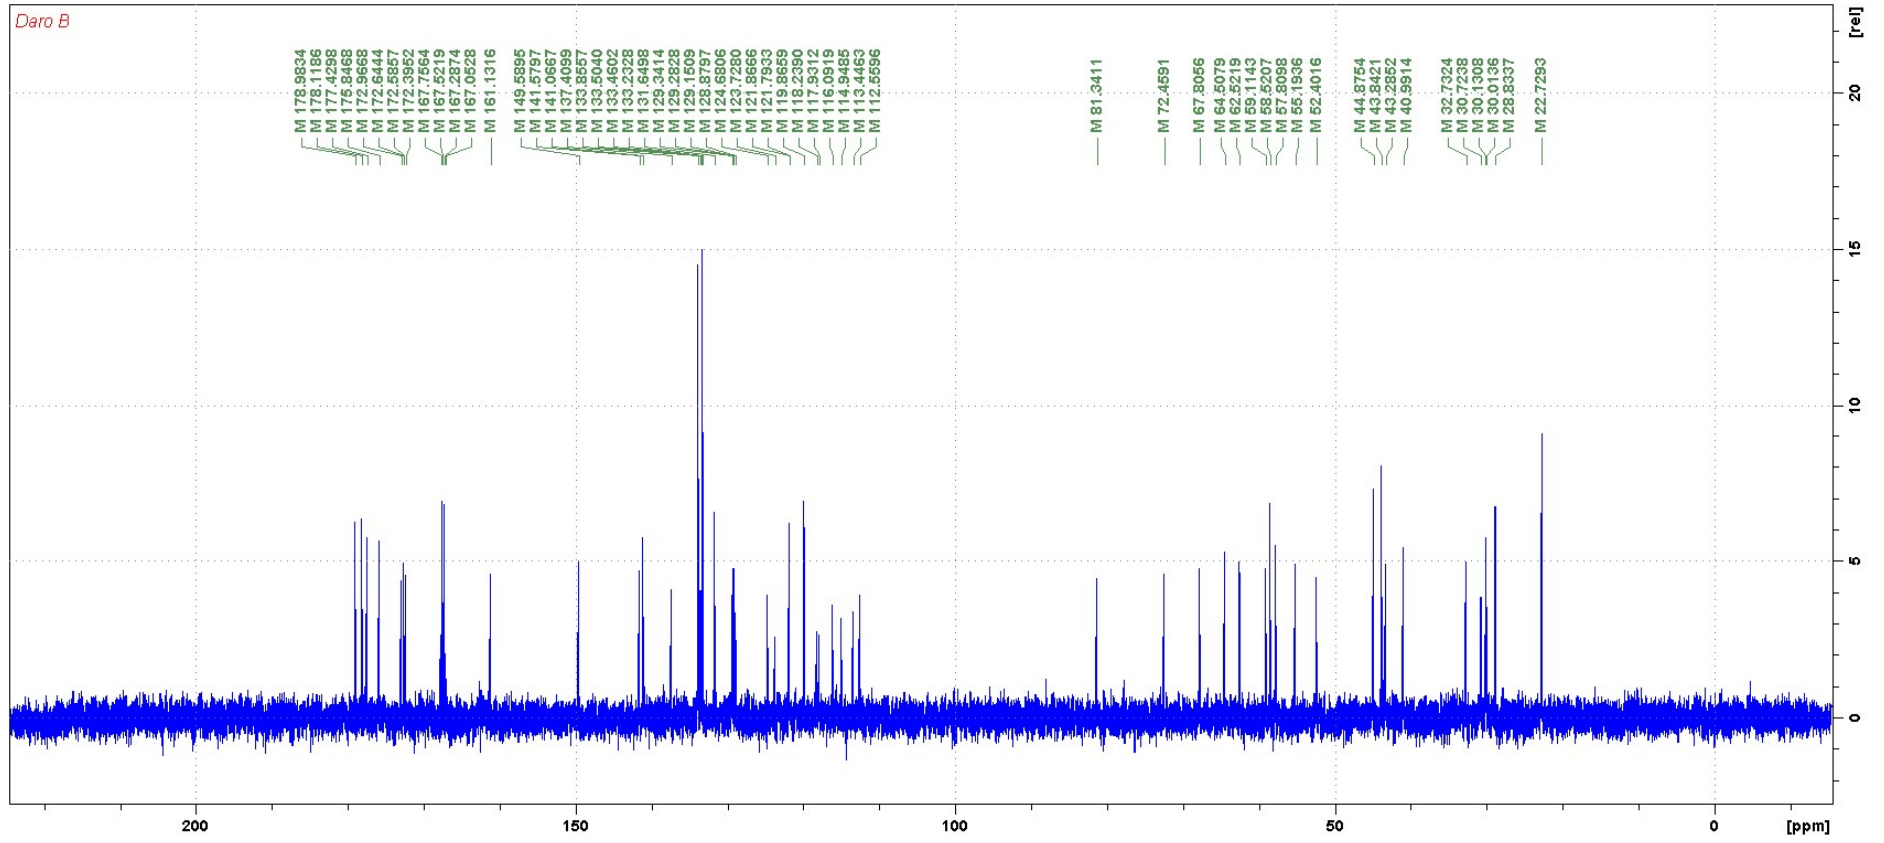

316

317

318 **Figure S5D:** COSY spectrum of Darobactin B in D<sub>2</sub>O.

319

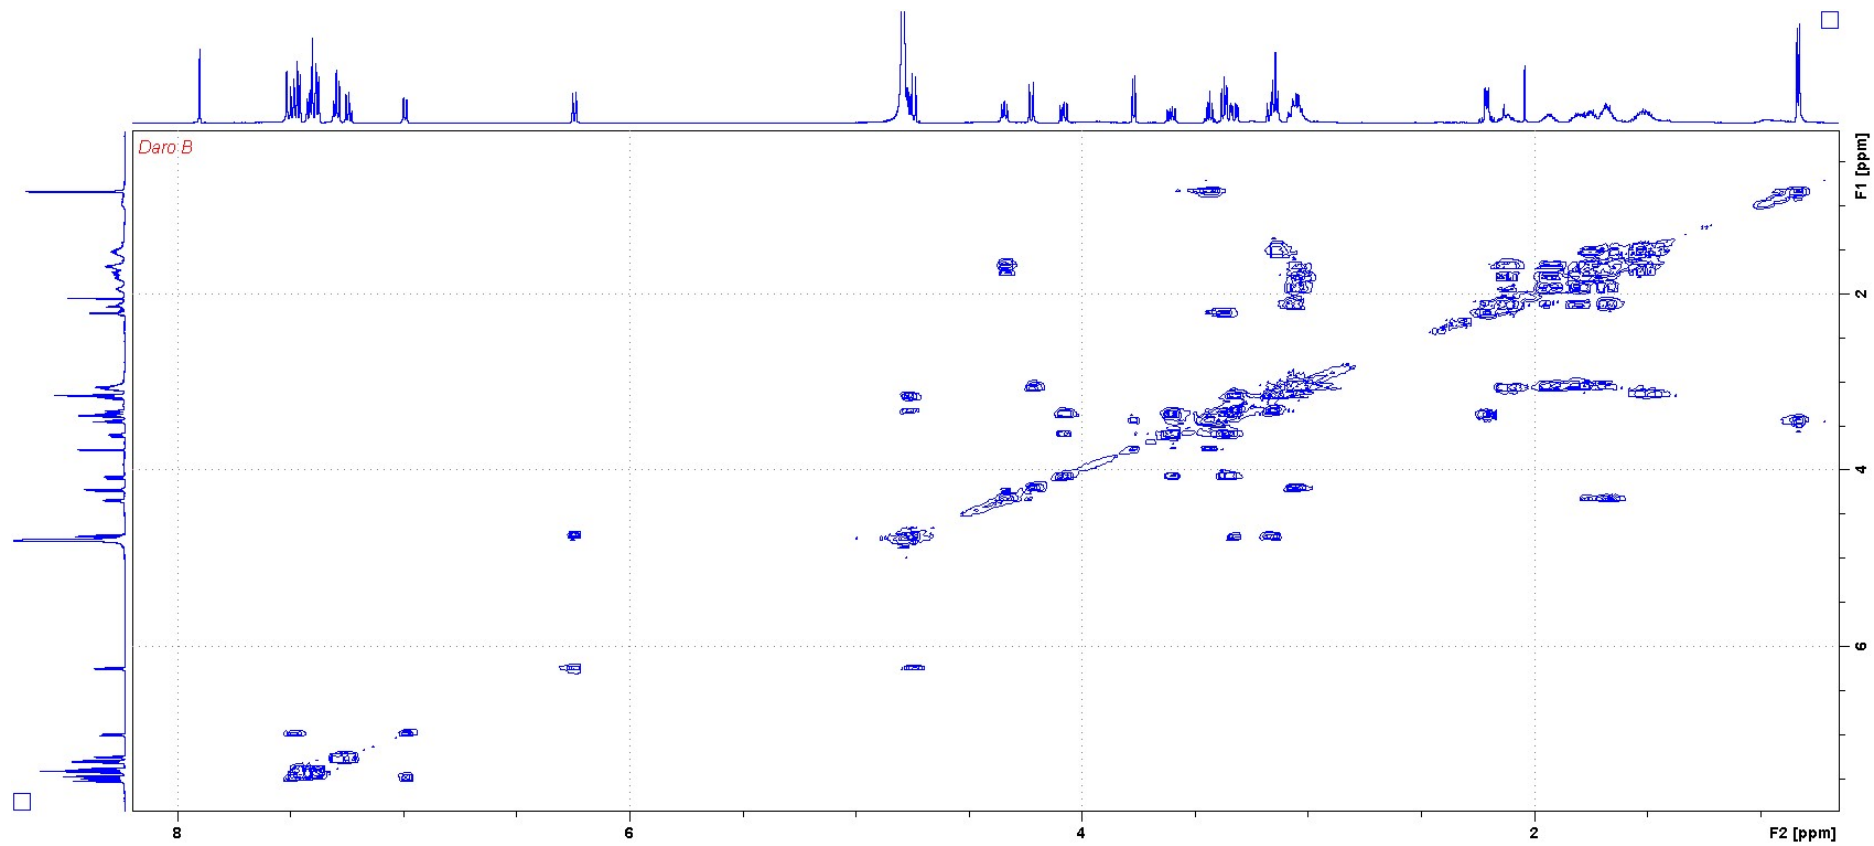

320

321

322 **Figure S5E:** TOCSY spectrum of Darobactin B in D<sub>2</sub>O.

323

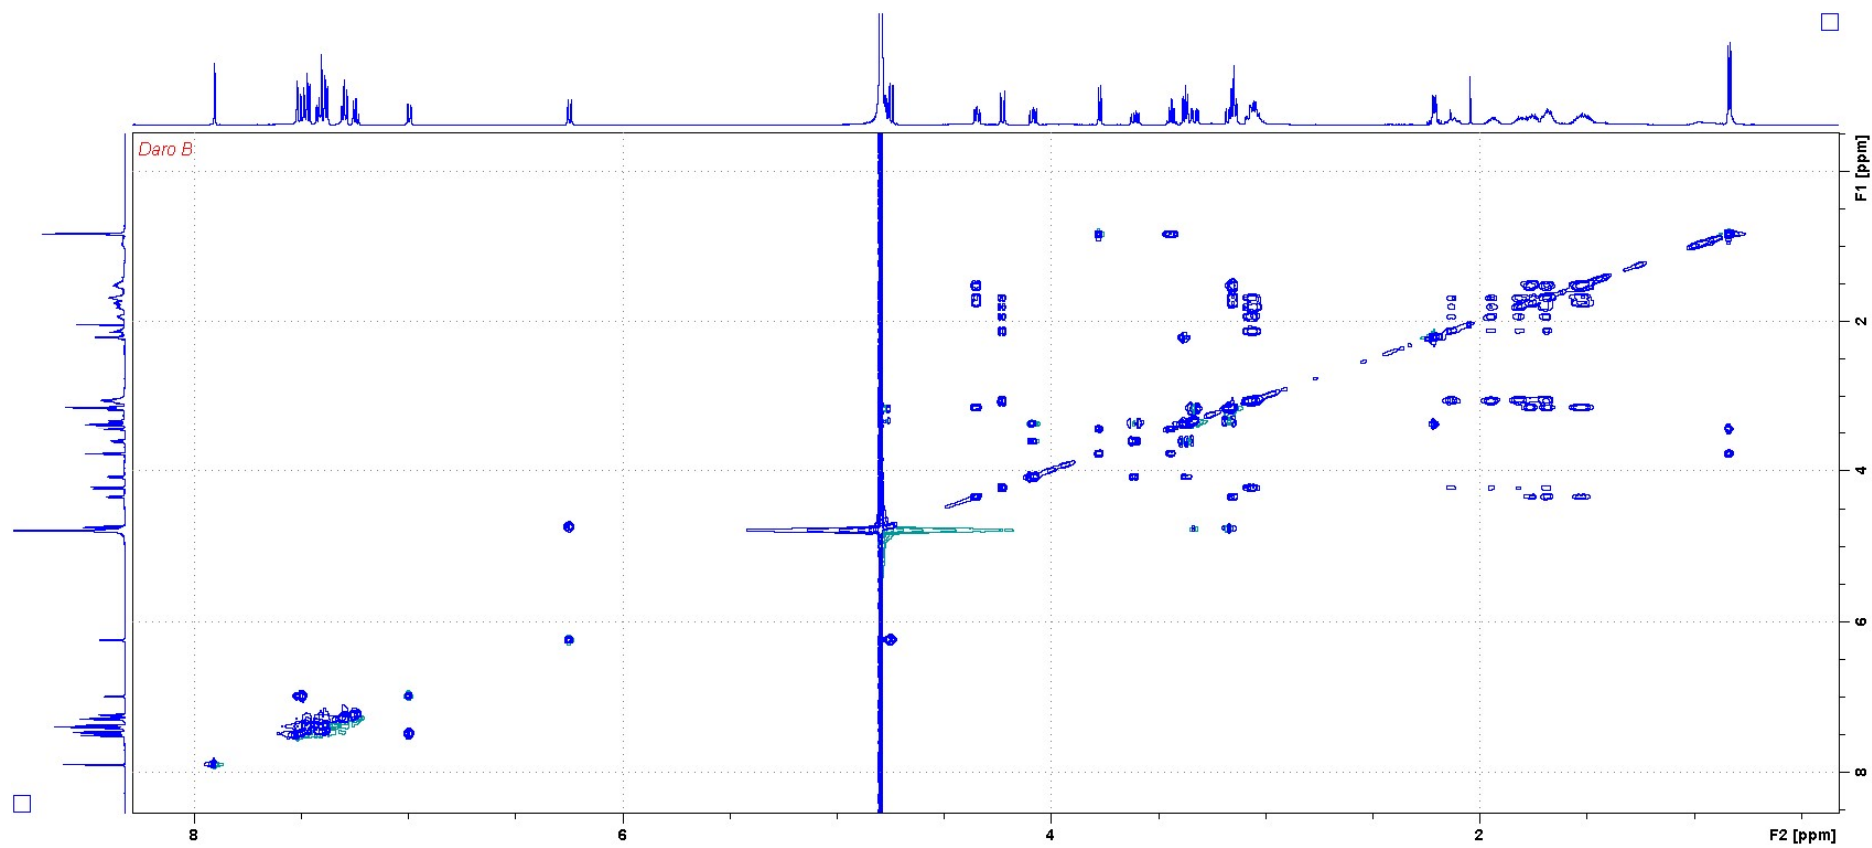

324

325

326

327 **Figure S5F:** HSQC spectrum of Darobactin B in D<sub>2</sub>O.

328

329

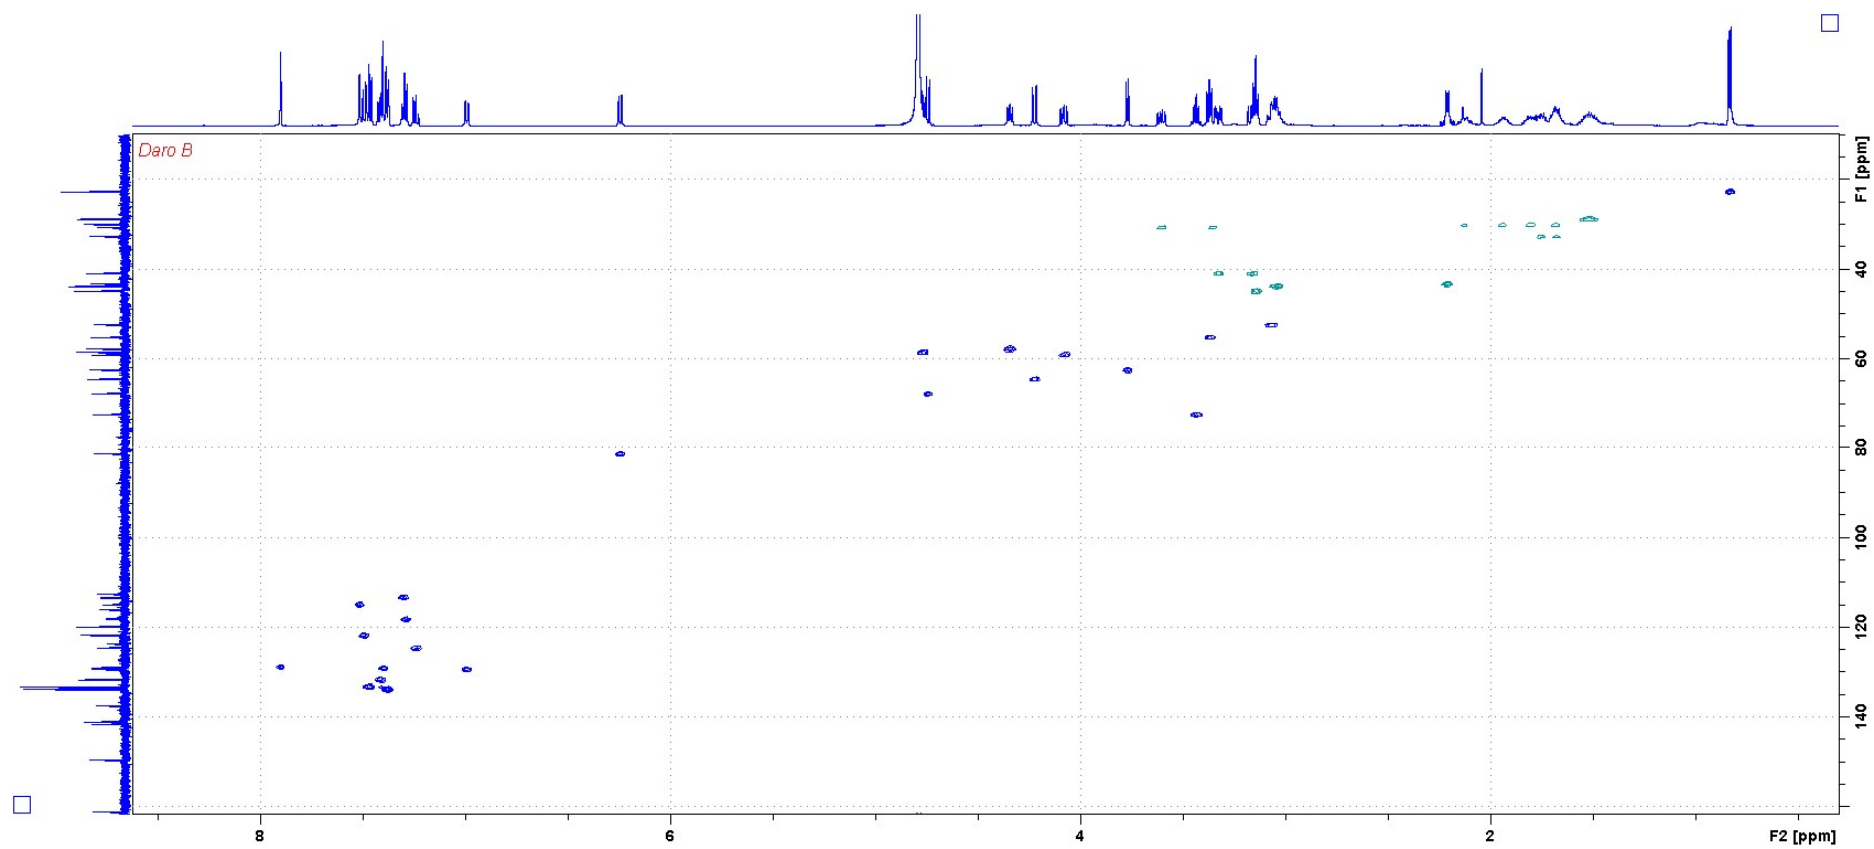

330

331

332

333 **Figure S5G:** HMBC spectrum of Darobactin B in D<sub>2</sub>O. The spectrum was measured using non-uniform sampling (NUS) and H<sub>2</sub>O  
334 suppression.

335

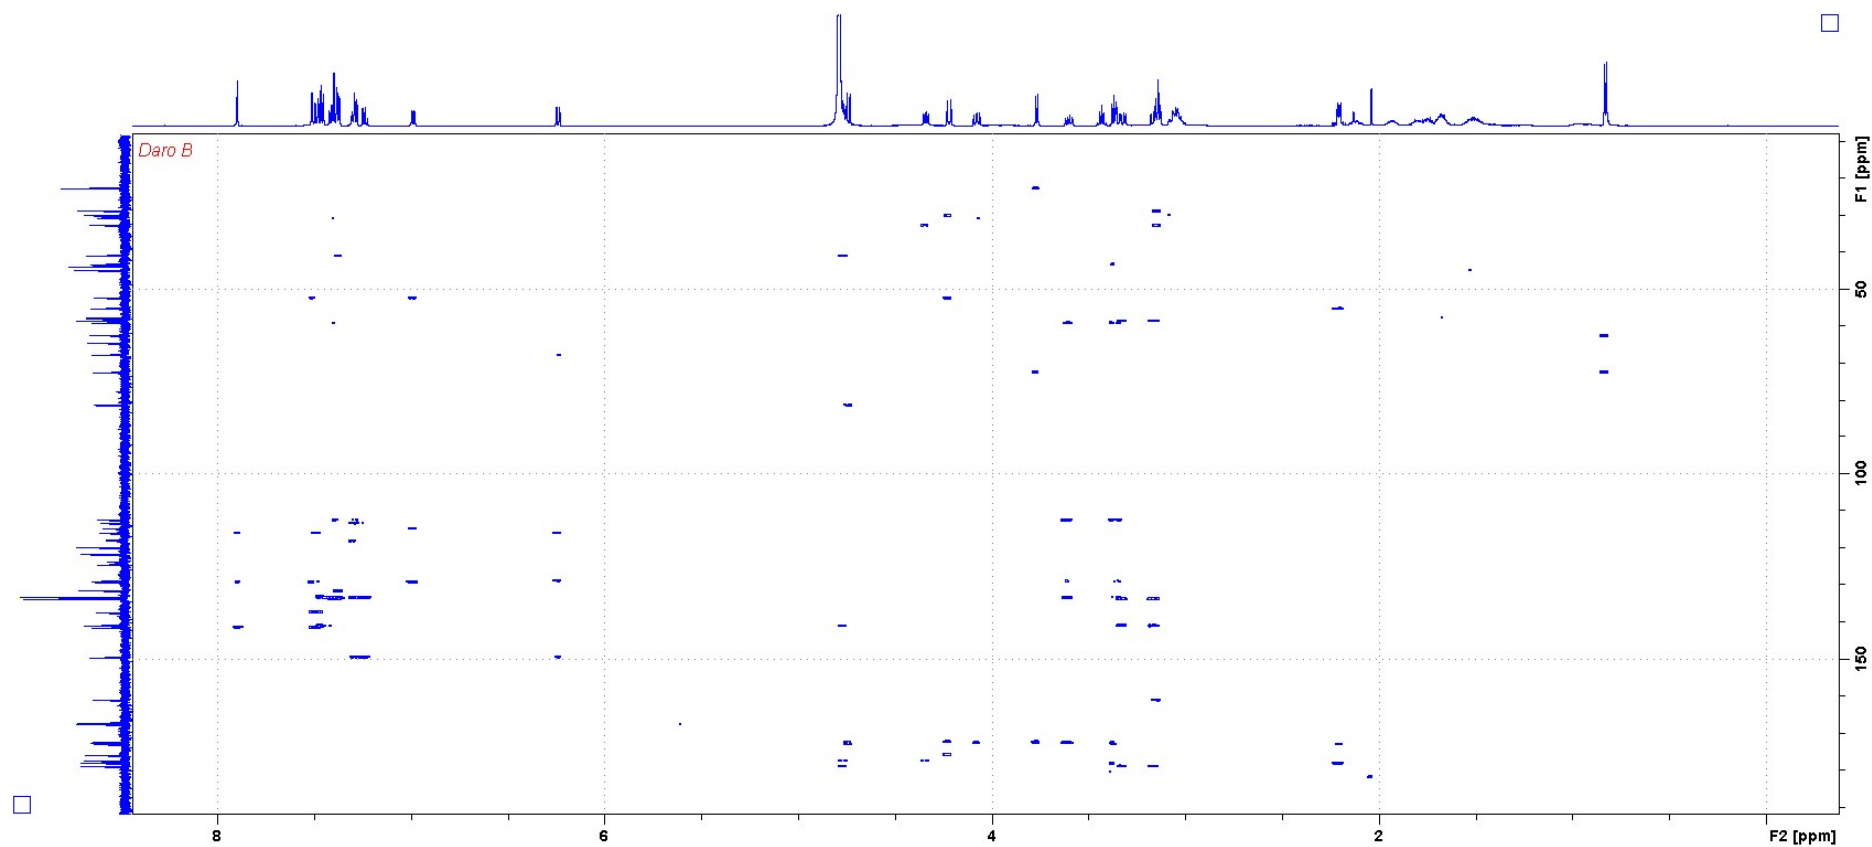

338 **Figure S5H:** NOESY spectrum of Darobactin B in D<sub>2</sub>O.

339

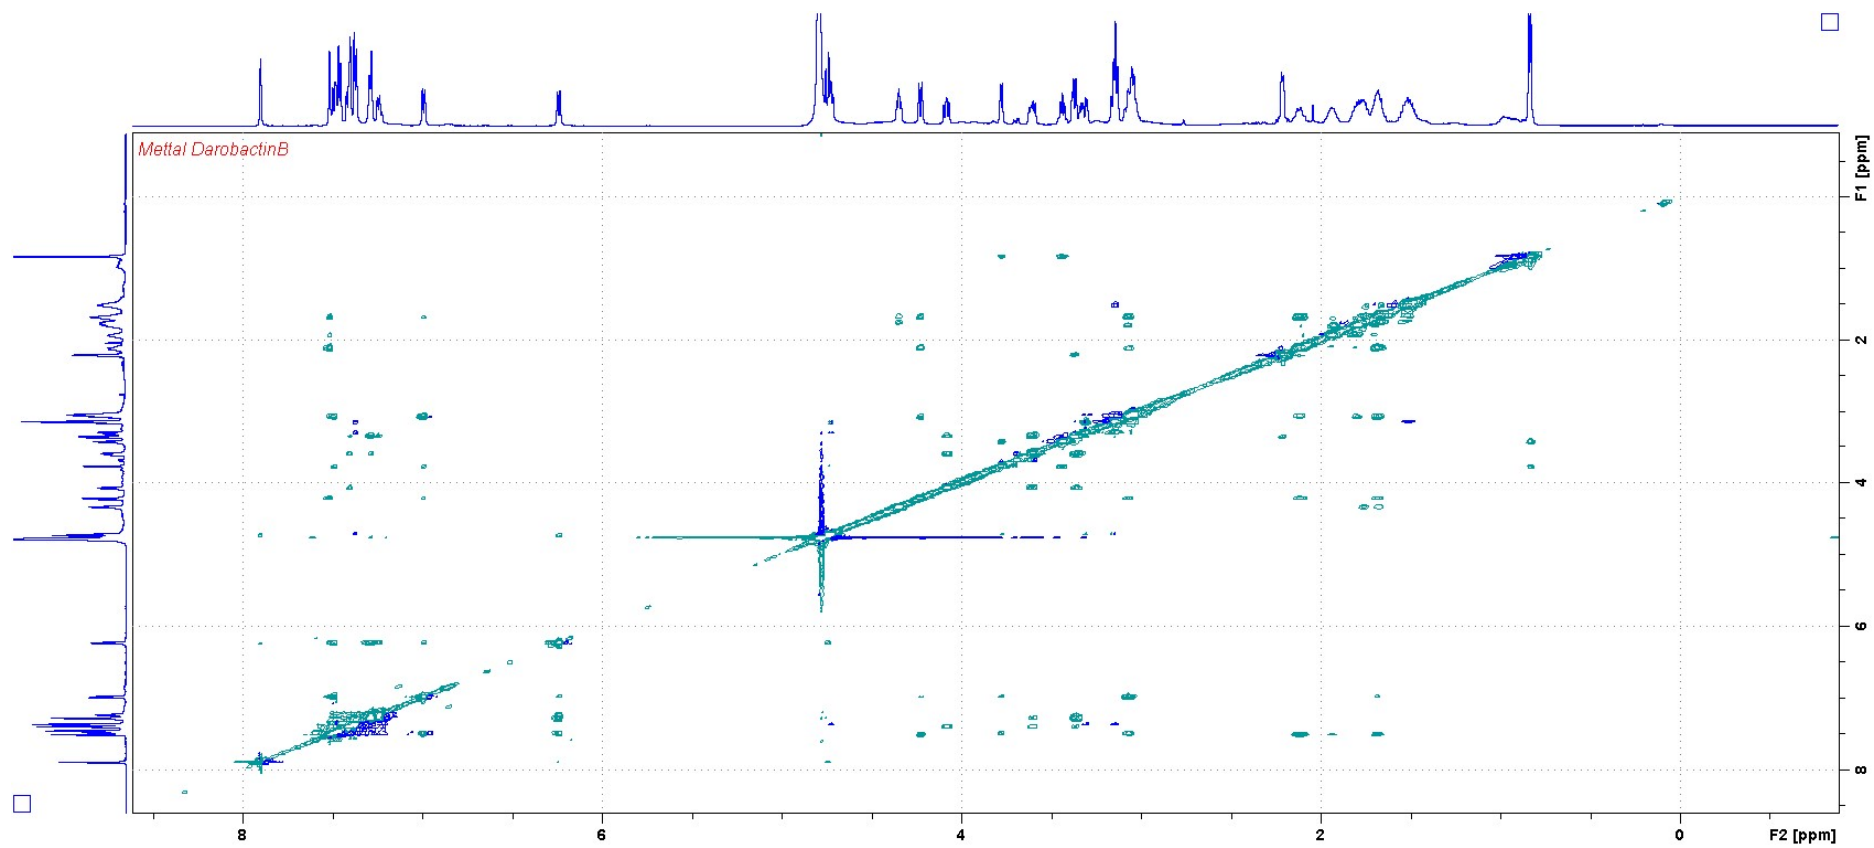

340

341

342 **Figure S5I:** ROESY spectrum of Darobactin B in D<sub>2</sub>O.

343

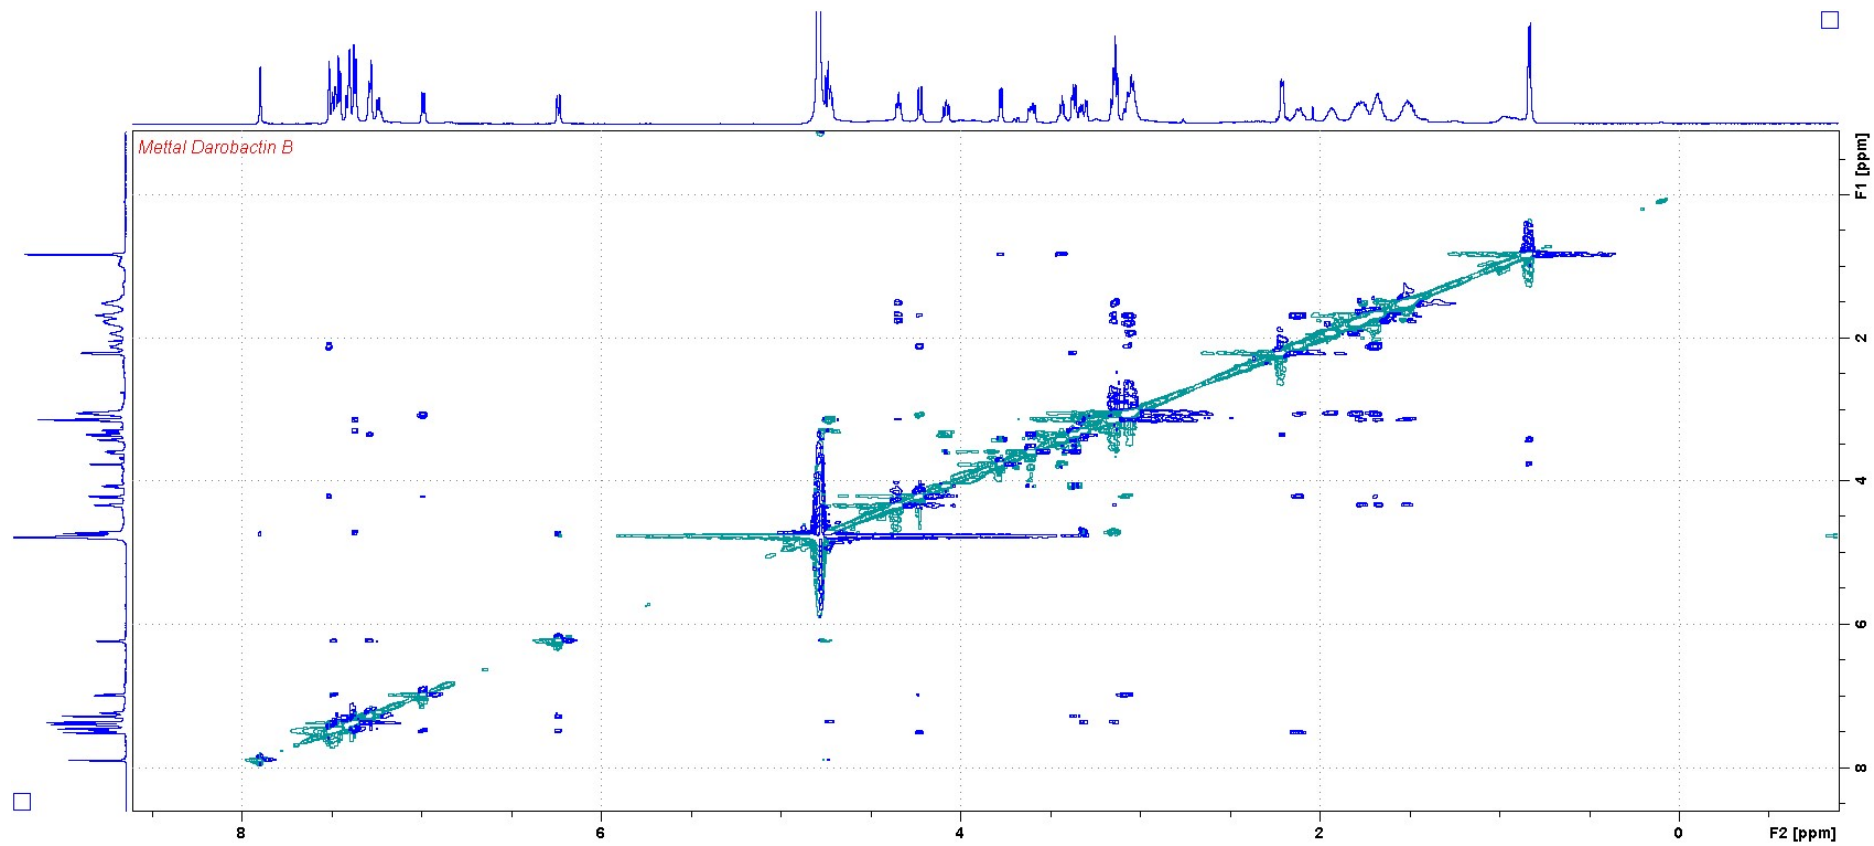

344

345



346 **Table S2:** Oligonucleotide sequences used to modify the DAR A core AAs in  
 347 pNBDaromod

| Primer name | Oligonucleotide sequence                       |
|-------------|------------------------------------------------|
| DaroAf      | CCTAAGATCCCTGAGATCACGGCCTGGAAGTGGTCAAAAAGCTTC  |
| DaroAr      | TTTAGAAGCTTTTTGACCAGTTCAGGCCGTGATCTCAGGGATCT   |
| DaroBf      | CCTAAGATCCCTGAGATCACGGCCTGGAAGTGGACAAAAAGATTC  |
| DaroBr      | TTTAGAATCTTTTTGTCCAGTTCAGGCCGTGATCTCAGGGATCT   |
| DaroCf      | CCTAAGATCCCTGAGATCACGGCCTGGTCATGGTCAAGATCATTTC |
| DaroCr      | TTTAGAATGATCTTGACCATGACCAGGCCGTGATCTCAGGGATCT  |
| DaroDf      | CCTAAGATCCCTGAGATCACGGCCTGGAAGTGGTCAAGAAGCTTC  |
| DaroDr      | TTTAGAAGCTTCTTGACCAGTTCAGGCCGTGATCTCAGGGATCT   |
| DaroEf      | CCTAAGATCCCTGAGATCACGGCCTGGTCATGGTCAAAGAGCTTC  |
| DaroEr      | TTTAGAAGCTCTTTGACCATGACCAGGCCGTGATCTCAGGGATCT  |
| DaroFf      | CCTAAGATCCCTGAGATCACGGCCTGGAAGTGGTCAAAGAATCTTC |
| DaroFr      | TTTAAAGATCTTTGACCAGTTCAGGCCGTGATCTCAGGGATCT    |

348  
 349  
 350  
 351  
 352  
 353  
 354  
 355

**Table S3A:** Antibigram of the clinical isolates. CST: colistin, AMP: ampicillin, CTX: cefotaxime, GEN: gentamycin, KAN: kanamycin, CMP: chloramphenicol, OTE: oxytetracycline, CFX: cefazidime, MPM: meropenem, IPM: imipenem, RIF: rifampicin, TET: tetracycline. Values in µg/mL. Grey boxes indicate resistance.

|     | <i>E. coli</i> ATCC25922 | <i>E. coli</i> ATCC35218 | <i>E. coli</i> K0416 | <i>E. coli</i> MMGI1 | <i>E. coli</i> NRZ14408 | <i>E. coli</i> Survcare052 |
|-----|--------------------------|--------------------------|----------------------|----------------------|-------------------------|----------------------------|
| CST | <0.031                   | 0.125                    | 0.031                | 0.125                | 4                       | 0.25                       |
| AMP | 4                        | >64                      | >64                  | >64                  | >64                     | >64                        |
| CTX | <0.031                   | <0.031                   | >64                  | >64                  | >64                     | >64                        |
| GEN | 0.5-0.25                 | 0.25                     | 4-2                  | 64                   | >64                     | 0.5-0.25                   |
| KAN | 2                        | 2                        | >64                  | >64                  | >64                     | 1                          |
| CMP | 4-2                      | 64                       | 64                   | >64                  | >64                     | 4                          |
| OTE | 1                        | 2                        | 64                   | >64                  | >64                     | 2                          |
| CFX | 0.125                    | 0.063                    | 64                   | 8                    | 32                      | >64                        |
| MPM | 0.063                    | 0.125                    | 16                   | 1                    | 32                      | >64                        |
| IPM | 0.125                    | 0.125                    | 16-8                 | 2                    | 8                       | 64                         |
| RIF | 4                        | 4                        | 8                    | 8                    | >64                     | 8                          |
| TET | 0.5                      | 1                        | >64                  | >64                  | 64                      | 1                          |

356  
 357  
 358  
 359

360 **Table S3B:** Resistance determinants of the clinical isolates.

361

| Isolate    | Antibiotic resistance genes                                                                                                                  |
|------------|----------------------------------------------------------------------------------------------------------------------------------------------|
| NRZ14408   | aac(6')Ib-cr,aadA1,aadA2,aph(3')-Ic,ARR-3,blaKPC-2,blaOXA-1,blaTEM-1B,catA1,catB3,cmlA1,dfrA18,mcr-1,mph(A),QnrB2,strA,strB,sul1,sul3,tet(A) |
| K0416      | aac(6')Ib-cr,aacA4,aadA1,aadA5,aph(3')-Ic,blaTEM-1B,blaVIM-1,catA1,dfrA17,QnrB2,strA,strB,sul1,sul2,tet(A),tet(B)                            |
| Survicare0 | mph(A),sul1,sul2,dfrA12, blaCTX-M-15,blaNDM-5,aadA2,strA,strB                                                                                |
| MMG1       | aac(3)-IIa,aadA1,aph(3')-Ic,QnrS1,sul3,dfrA14,tet(A),floR, blaCTX-M-55,blaOXA-48,blaTEM-176                                                  |

362  
363  
364  
365  
366  
367

**Table S4:** Statistics on X-ray diffraction data and refinement of BamA-β/Darobactin B.

|                                | BamA-β /DarobactinB      |
|--------------------------------|--------------------------|
| PDB Identifier                 | 7P1C                     |
| Wavelength (Å)                 | 1.00002                  |
| Resolution range (Å)           | 50.11 - 2.5 (2.59 - 2.5) |
| Space group                    | I 1 2 1                  |
| Unit cell                      | 81.6 80.4 89.2           |
| α, β, γ (°)                    | 90 107.9 90              |
| Unique reflections             | 19080 (1887)             |
| Multiplicity                   | 13.3 (13.0)              |
| Completeness (%)               | 99.86 (100)              |
| Mean I/sigma(I)                | 7.5 (1.5)                |
| Wilson B-factor                | 46.8                     |
| R-merge (%)                    | 0.278 (2.952)            |
| Rpim (%)                       | 0.113 (0.851)            |
| CC1/2                          | 0.998 (0.789)            |
| Reflections used in Refinement | 19059 (1885)             |
| R-work                         | 0.232 (0.301)            |
| R-free                         | 0.251 (0.316)            |
| Number of atoms                | 3170                     |
| water                          | 90                       |
| Protein residues               | 368                      |
| RMS(bonds)                     | 0.004                    |
| RMS(angles)                    | 1.03                     |
| Ramachandran favored (%)       | 96.70                    |
| Ramachandran outliers (%)      | 0.0                      |
| Clashscore                     | 1.53                     |
| Average B-factor               | 64.0                     |

368 \*The values in parentheses correspond to the highest resolution shell

369

370 **References**

371

372 1. Anonymous. 2021. PubChem Bioassay Record for AID 1937, Source: Burnham Center for  
373 Chemical Genomics, *on* PubChem. Accessed May 5<sup>th</sup>, 2021.

374

375 2. Adams KJ, Pratt B, Bose N, Dubois LG, St John-Williams L, Perrott KM, Ky K, Kapahi P,  
376 Sharma V, MacCoss MJ, Moseley MA, Colton CA, MacLean BX, Schilling B, Thompson JW,  
377 Alzheimer's Disease Metabolomics C. 2020. Skyline for Small Molecules: A Unifying Software  
378 Package for Quantitative Metabolomics. *J Proteome Res* 19:1447-1458.
